# Supplementary material
Source: PubMed Central journal article supplement (PMC3617388)
Supplement: mmc1.pdf [file mmc1.pdf]

American Journal of Human Genetics, Volume 92

## **Supplemental Data**

# **Complete Haplotype Sequence of the Human Immunoglobulin Heavy-Chain Variable, Diversity, and Joining Genes and Characterization of Allelic and Copy-Number Variation**

**Corey. T. Watson, Karyn M. Steinberg, John Huddleston, Rene L. Warren, Maika Malig, Jacqueline Schein, A.J. Willsey, Jeffrey B. Joy, Jamie K. Scott, Tina Graves, Richard K. Wilson, Robert A. Holt, Evan E. Eichler, and Felix Breden**

## **Supplemental Inventory**

### **Supplemental Figures and Tables**

Figure S1, Related to Figure 4

Figures S2–S11

Figure S12–S14, Related to Figure 4

Tables S1–S8

A

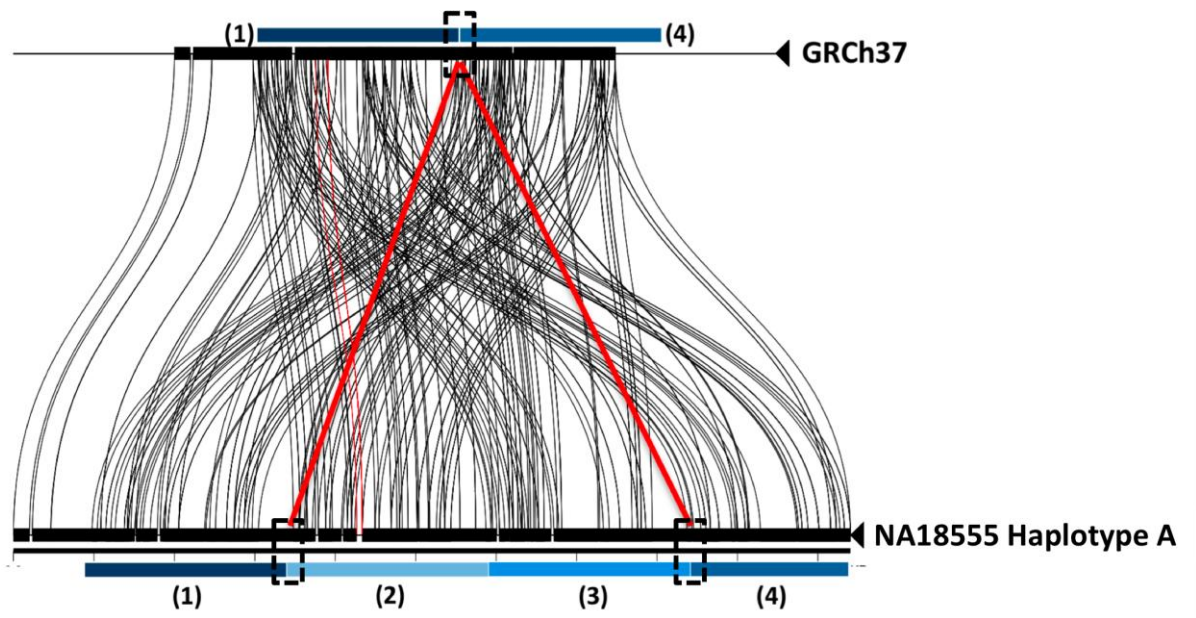

B

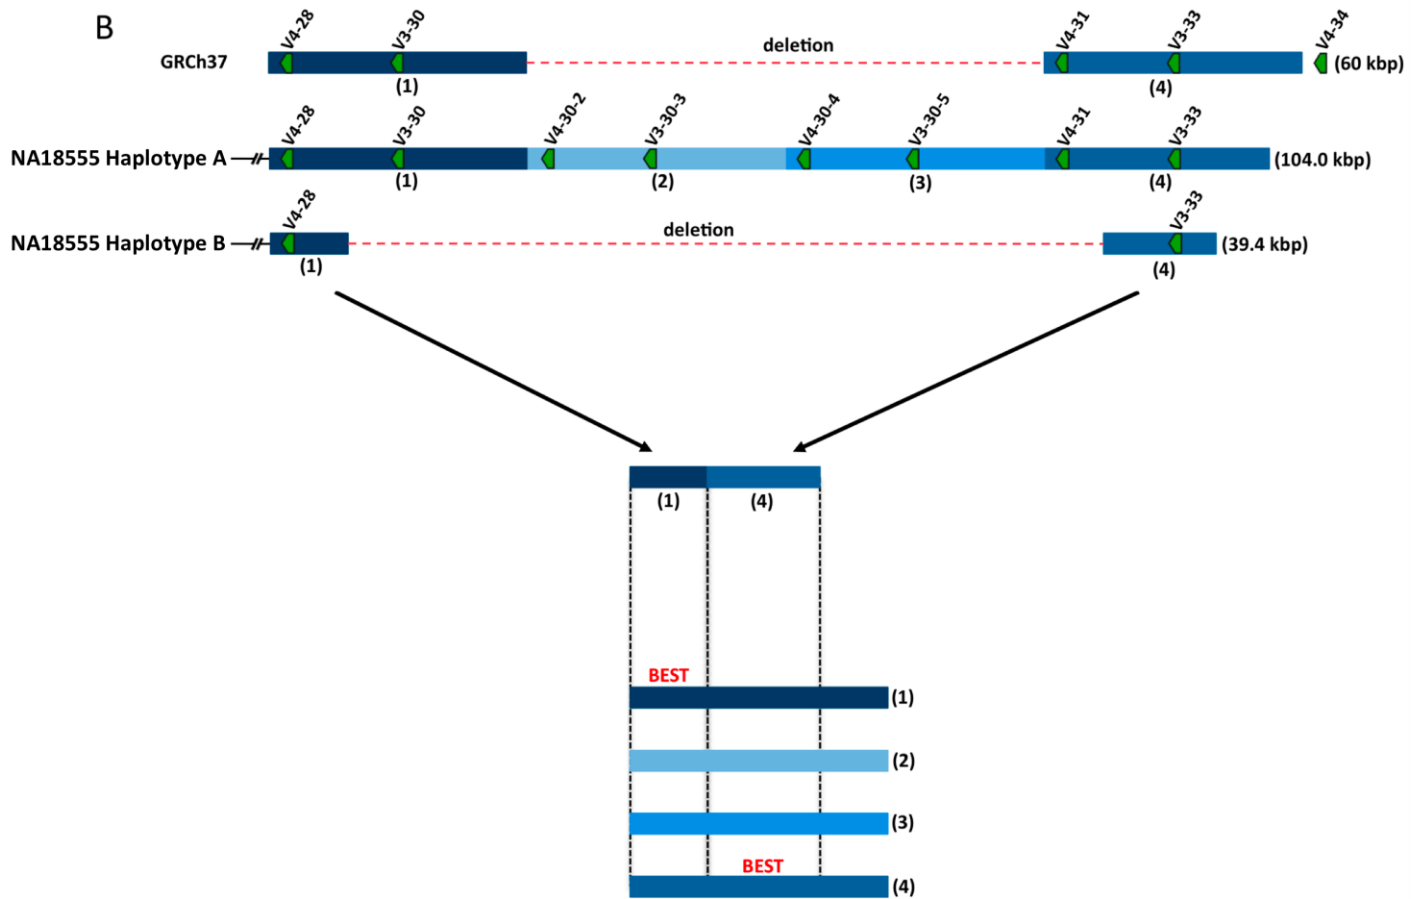

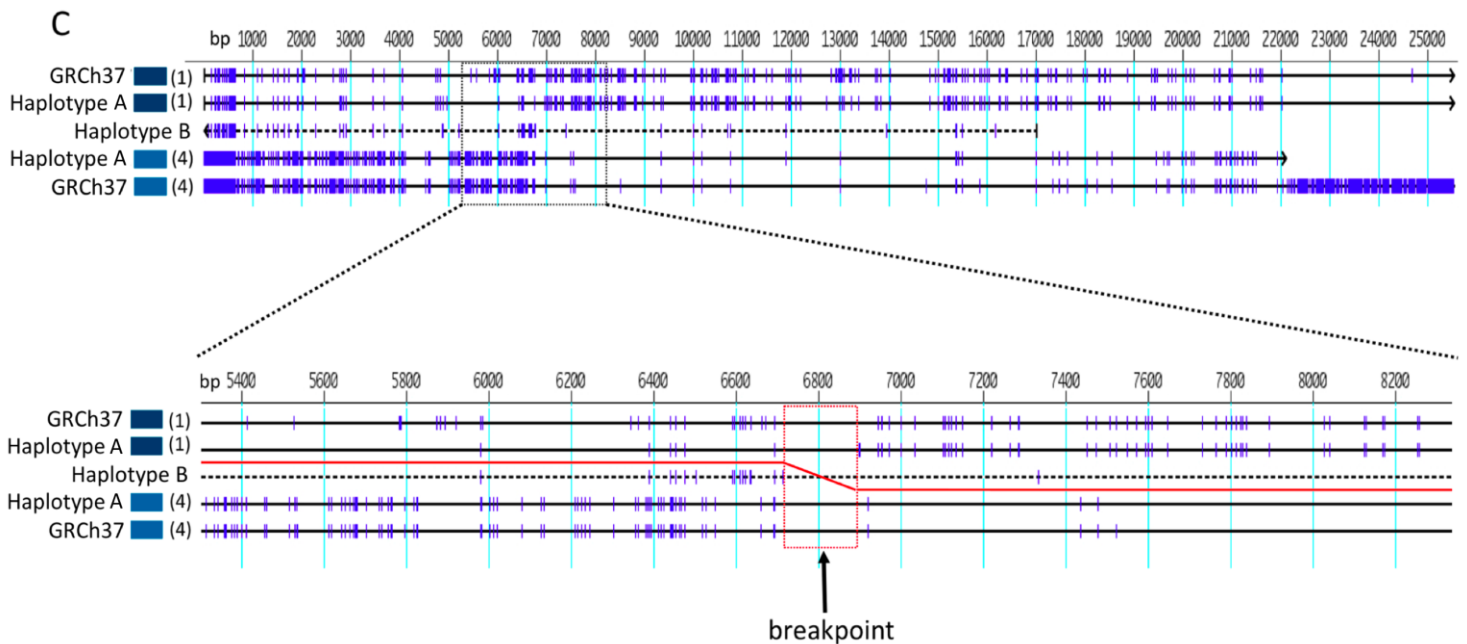

**Figure S1. Method used to determine complex events in the CNV hotspot between *IGHV4-28* and *IGHV4-34*.** (A) Comparison of NA18555 Haplotype A to a ~100 kbp region of GRCh37 (also see Figure 4, main text). The positions of *IGHV* genes in GRCh37 are shown in the top panel (red rectangles), with gene name labels indicated on the right. The black bars seen on both haplotypes connected by thin black lines represent regions of shared sequence, either homologous or paralogous sequence blocks, as determined by the program Miropcats (Parsons 1995). The blue shaded bars above GRCh37 and below NA18555 Haplotype A represent a ~25 kbp segment that is shared between the two haplotypes, the structure of which is indicative of a segmental duplication; this duplication block is represented twice in GRCh37 and four times in NA18555 Haplotype A. The four different shades of blue represent distinct versions of this segmental duplication (labelled 1-4). The bold red lines indicate the predicted breakpoints of the complex insertion event in Haplotype A as compared to GRCh37, which are also highlighted by black boxes (see B below). Given the complicated genomic structure and the number of CNV-containing haplotypes identified in this region (full list in Figure 4, main text), the breakpoint analysis method illustrated for the *IGHV3-23* duplication example in Figure 3 of the main text could not be used to identify breakpoints in this region. Thus, we developed the method depicted in (B). (B) Sequence from complete or partial segmental duplications in each of three haplotypes are shown (1-4, NA18555 Haplotype A; 1 & 4, in NA18555 Haplotype B and GRCh37), represented by blue shaded bars as in (A). For this method, the best sequence alignments between all segmental duplications 1-4 are determined; the event boundaries are then predicted from this alignment by searching for the point in the alignment at which the sequence similarities between the aligned sequences change as shown in the bottom panels of (B) and (C). (C) This image shows an expanded and zoomed-in version of a multi-sequence alignment containing sequences of the ~25 kbp segmental duplicates (shown in panels A and B) from GRCh37, and the NA18555 Haplotype A and Haplotype B haplotypes. Alignment bp positions are shown along the top of the diagram. Each sequence is represented by a single horizontal black line, labelled with a haplotype name and the duplication block color and number corresponding to those shown in panels A and B. Blue tick marks on each line indicate single nucleotide differences and gaps between a given sequence and all other sequences in the alignment; thus, tick marks observed at the same position in more than one sequence of the alignment identify positions of shared sequence. The red line tracks the most similar alignments of the middle NA18555 Haplotype B sequence to the other four sequences from GRCh37 and NA18555 Haplotype A. Based on changes in nucleotide similarity on either side of the 249 bp region in which all aligned sequences share 100% sequence identity (within red box, bottom panel), the event breakpoint is presumed to have occurred

within this segment. In the case of NA18555 Haplotype B, it is not clear whether this event arose from a haplotype like that of the human reference genome, which contains segmental duplications 1 and 4, or was mediated by a haplotype like NA18555 Haplotype A containing segmental duplications 1-4. In addition, because NA18555 Haplotype A includes two additional duplication blocks as compared to GRCh37 (panels A and B), it is not clear whether NA18555 Haplotype A occurred from a single event or is the result of more than one round of expansion via segmental duplication.

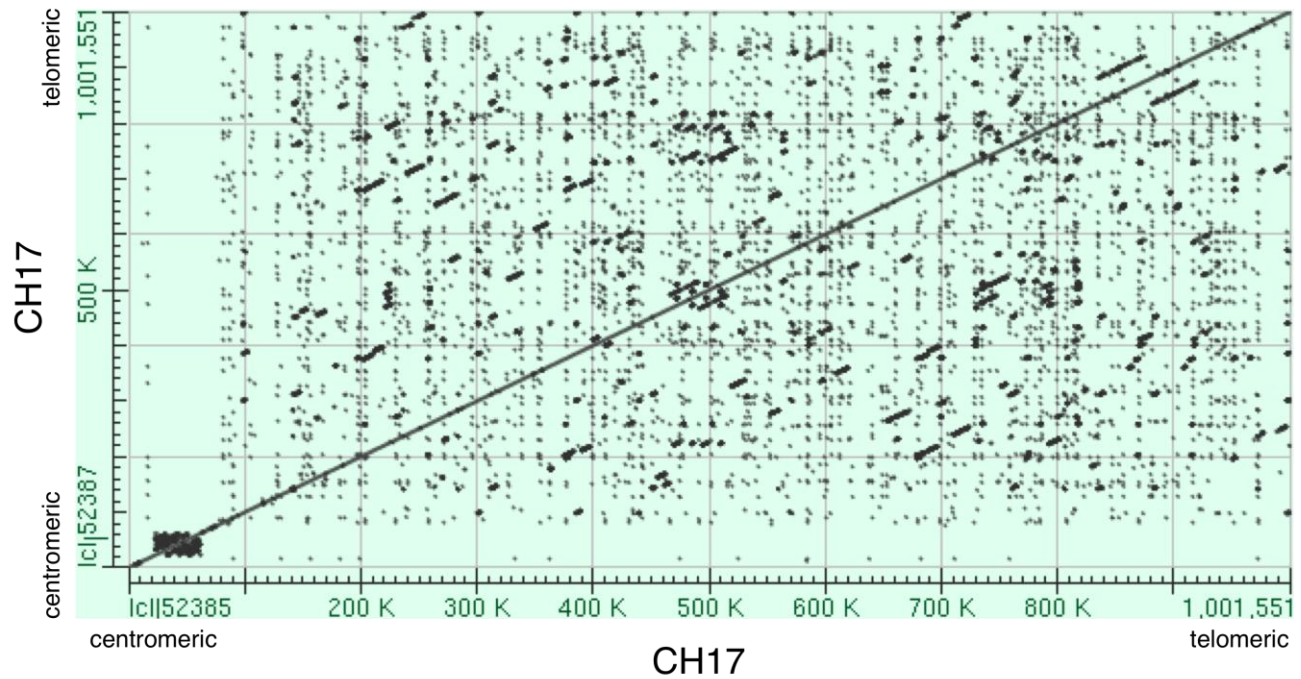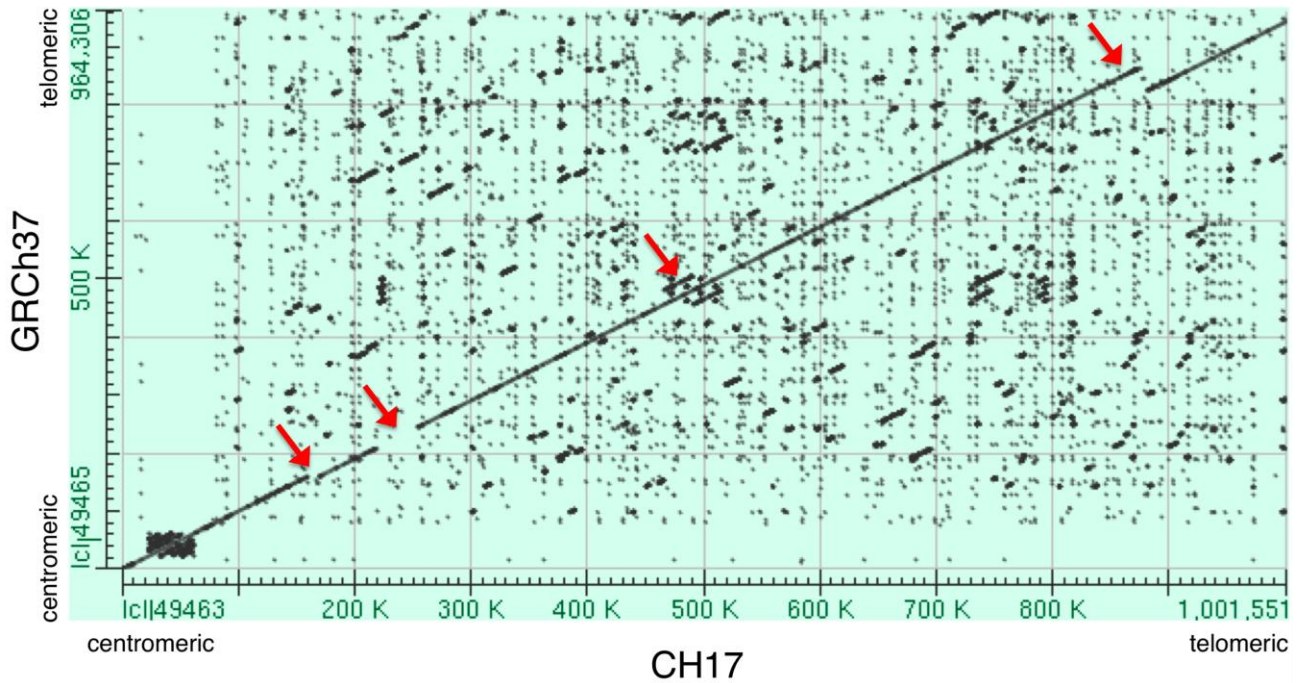

**Figure S2. Dotplot analyses of CH17 and GRCh37 haplotypes**

Top panel: a self pairwise BLAST of the CH17 haplotype including sequence spanning the IGHJ gene cluster to 49 kbp upstream of *IGHV7-81*. Bottom panel: a pairwise BLAST between the CH17 haplotype and GRCh37 (chr14: 106324366-107268434). Red arrows indicate the positions of CNVs depicted in Figure 1B.

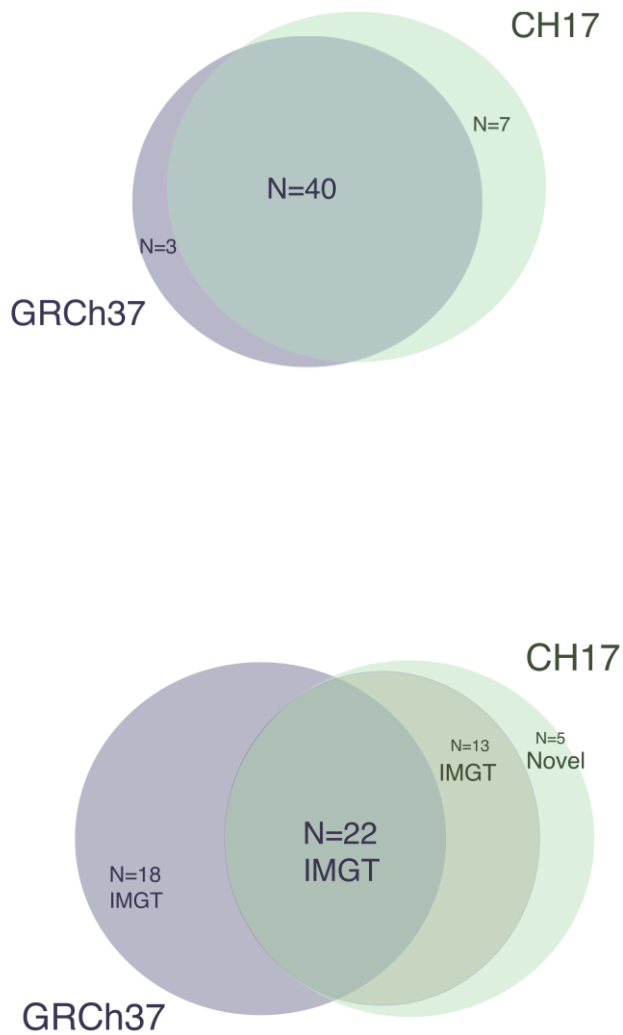

**Figure S3. Comparison of IGHV gene content between GRCh37 and CH17 haplotypes.** Top panel: Venn diagram depicting IGHV gene overlap between GRCh37 and CH17 haplotypes. As shown there are seven genes that are unique to CH17 and three genes that are unique to GRCh37, which are the result of gene gains and losses associated with CNVs. Bottom panel: Venn diagram depicting the overlap of identified IGHV gene alleles between the GRCh37 and CH17 haplotypes: at the 40 shared genes between the two haplotypes (Figure S3) there are 22 alleles that are found in both GRCh37 and CH17, 18 that are unique to GRCh37, and 18 that are unique to CH17. Five of the 18 alleles unique to CH17 are novel, and were not previously represented in IMGT ([www.imgt.org](http://www.imgt.org)).

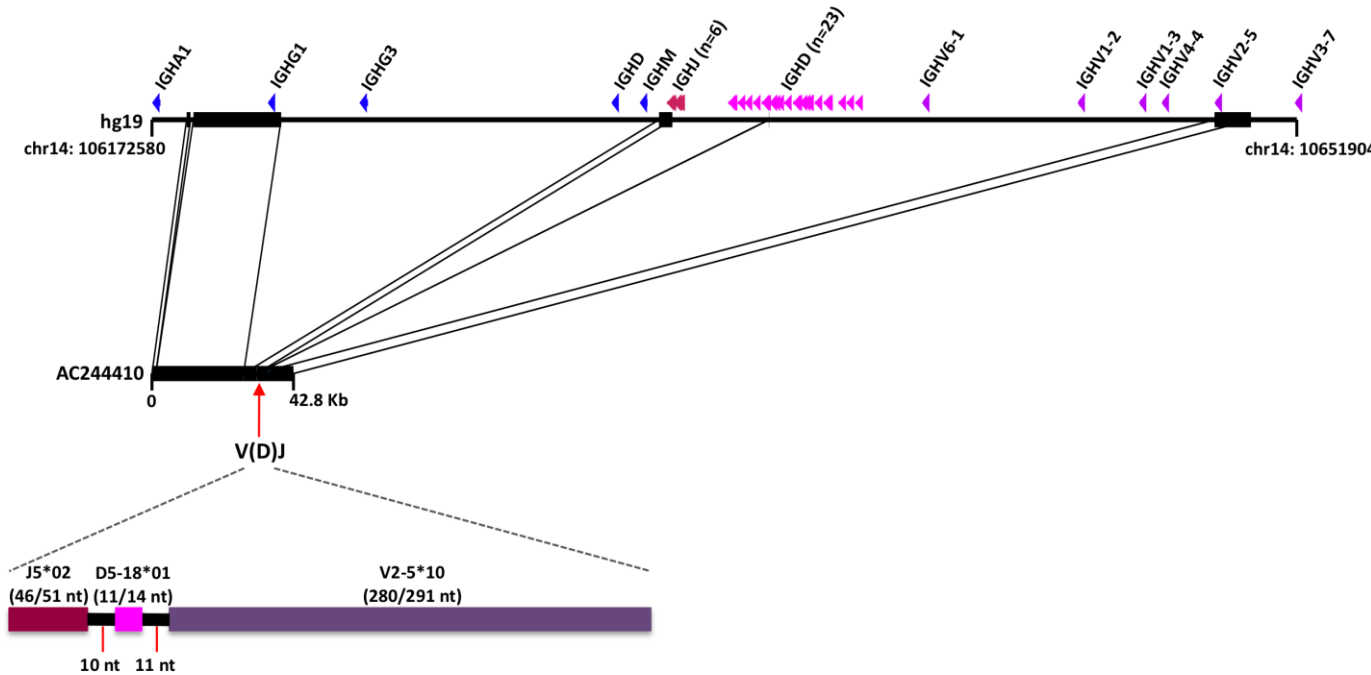

**Figure S4. A sequenced V-(D)-J somatic rearrangement**

Diagram of the structural comparison of a fosmid clone from the NA18507 library (AC244410) and the GRCh37 IGH reference sequence (chr14:106172580-106519042). The positions and names of IGH genes are indicated by colored triangles and black labels shown above the GRCh37 haplotype: IGHC genes (blue), IGHI genes (magenta), IGHD genes (pink), and IGHV genes (purple). Regions of shared sequence between the fosmid clone and GRCh37 are indicated by thick black bars connected by black lines between the two haplotypes. Large stretches of sequence found in GRCh37 (depicted by thin horizontal black lines in the GRCh37 haplotype) were deleted in the fosmid; these deleted segments were located between the IGHI, IGHD, and IGHV genes that were selected during the V-(D)-J somatic rearrangement event. In addition to the loss of large stretches of sequence in each gene region, we observed evidence of class-switch recombination (CSR), junctional diversity (JD), and somatic hypermutation (SHM)—all processes that occur at different stages in developing B cells, either during antibody rearrangement (JD) or antibody/B cell selection post-antigen stimulation (CSR, SHM). A large apparent deletion including *IGHG3*, *IGHD*, and *IGHM* is indicative of CSR. Colored bars at the bottom of the figure show a close-up view of the V-(D)-J rearrangement observed in this fosmid. Black labels indicate the names of the IGHI gene (magenta bar), IGHD gene (pink bar), and IGHV gene (purple bar) selected in the observed rearrangement, and the most similar known alleles are noted (*IGHI5\*02*, *IGHD5-18\*01*, and *IGHV2-5\*10*). Numbers in parenthesis indicate the nucleotide similarity between these alleles and the IGHI, IGHD, and IGHV gene sequences annotated in the fosmid clone; nucleotide differences are indicative of SHM. The number of inserted nucleotides between IGHI and IGHD, and IGHV and IGHD are also shown and are indicative of JD. Analysis of nine additional clones also confirmed the presence of somatic V-(D)-J rearrangements, CSR, SHM, and JD. Point mutations characteristic of SHM were identified by comparing IGHV, IGHD, and IGHI gene sequences to known alleles; in each of the ten somatically-rearranged fosmids sequenced, point mutations were observed in the IGHV, IGHD, and IGHI genes involved in the rearrangement (Table S8). SHM is known to be a highly targeted process that occurs only within the rearranged IGHV, IGHD, and IGHI genes. In support of this, for clones in which additional IGHV and IGHI genes were present upstream and downstream of the rearranged IGHV and IGHI genes, no evidence of SHM was observed (Table S8).



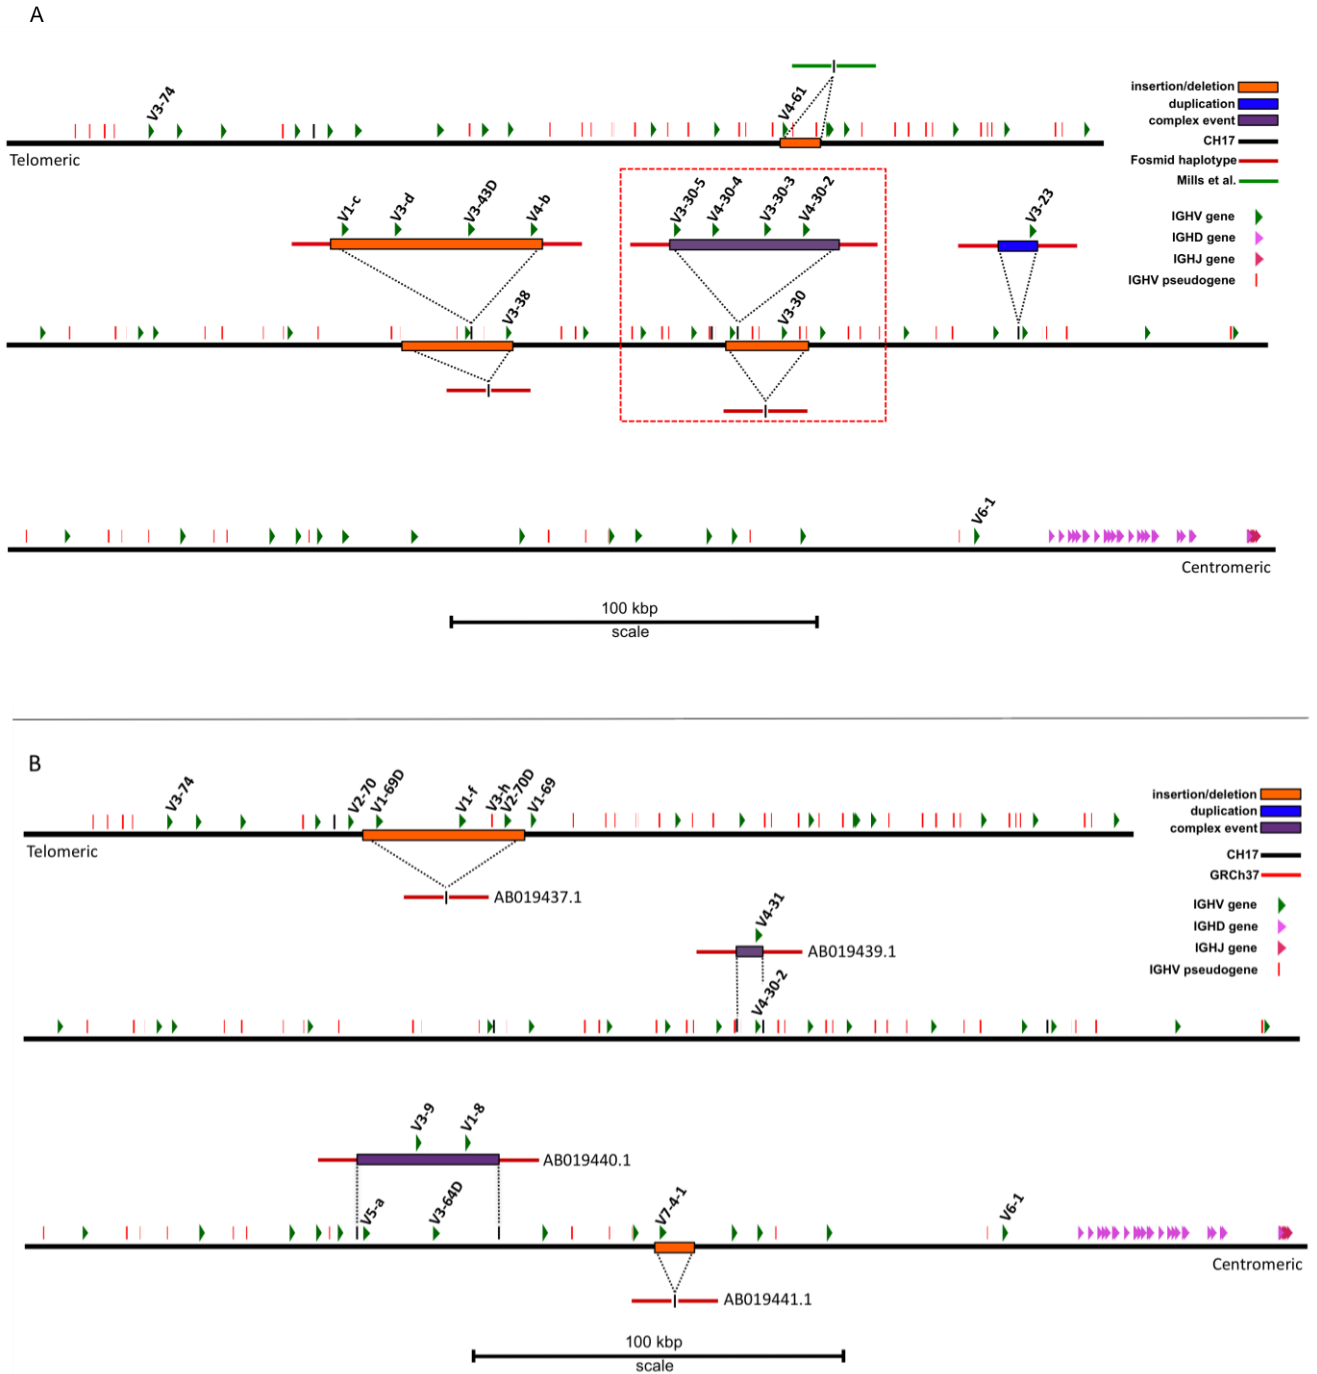

**Figure S5. Mapping of CNVs to the CH17 IGH haplotype.** (A) The positions of three deletions, two insertions, one duplication, and one complex event characterized from fosmid alternative haplotypes are shown mapped to the CH17 IGH reference (black line) with the same parameters as in Figure 1B. The locus is presented in the same orientation as that depicted by IMGT. Functional and ORF IGHV, IGHD, and IGHJ genes (not to scale) as well as IGHV pseudogenes are shown (to scale); the names of IGHV genes involved in the characterized structural variants are indicated. The large red box indicates a hotspot region of recurrent mutation (see Figure 4 for additional haplotypes associated with this hotspot). The deletion of *IGHV4-61* was identified by Mills et al.<sup>5</sup> (chr14:107,084,861-107,096,738) is also shown. (B) CNVs identified between CH17 and GRCh37 mapped to the CH17 IGH haplotype. Accession numbers for clones from the GRCh37 reference assembly are indicated.

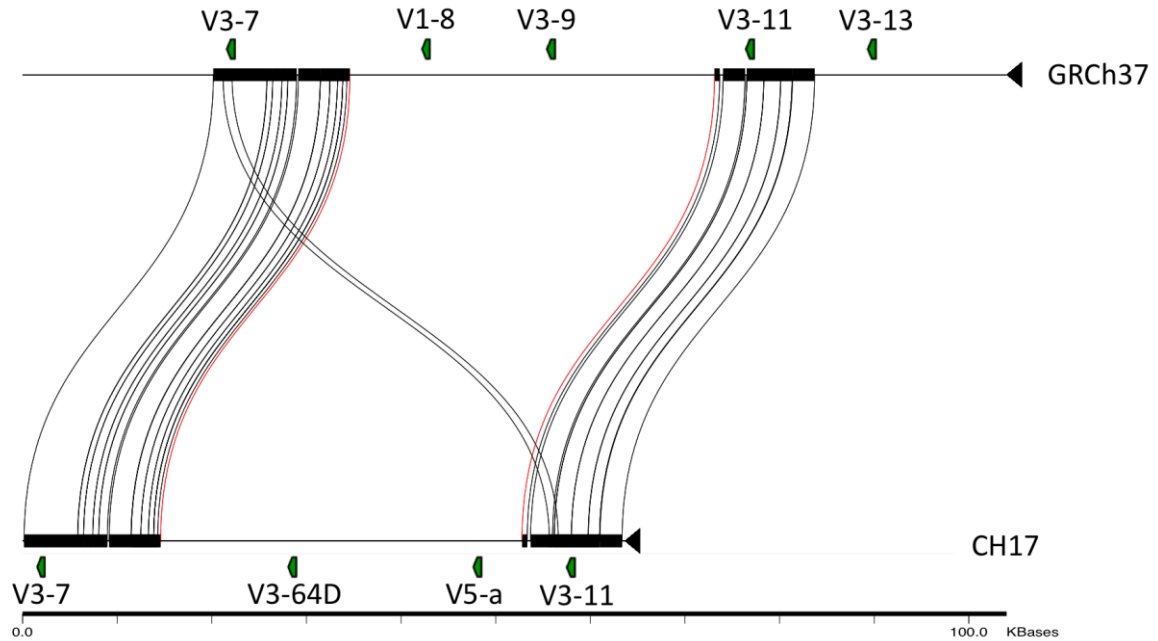

**Figure S6. Breakpoint analysis of the *IGHV5-a* and *IGHV3-64D* complex event.** A 65 kbp segment from the CH17 haplotype compared to GRCh37 (chr14:106500400-106605932) depicting the complex event that results in the “swap” of ~38 kbp of sequence between the two haplotypes, including either *IGHV1-8* and *IGHV3-9* or *IGHV5-a* and *IGHV3-64D*. Positions of annotated IGHV genes in GRCh37 and CH17 are depicted as green chevrons. The black bars seen on both haplotypes connected by thin black lines represent regions of shared sequence. The breakpoints of the event are indicated by thin red lines. The origins of the haplotype-specific sequences in each of these haplotypes are not known.

A

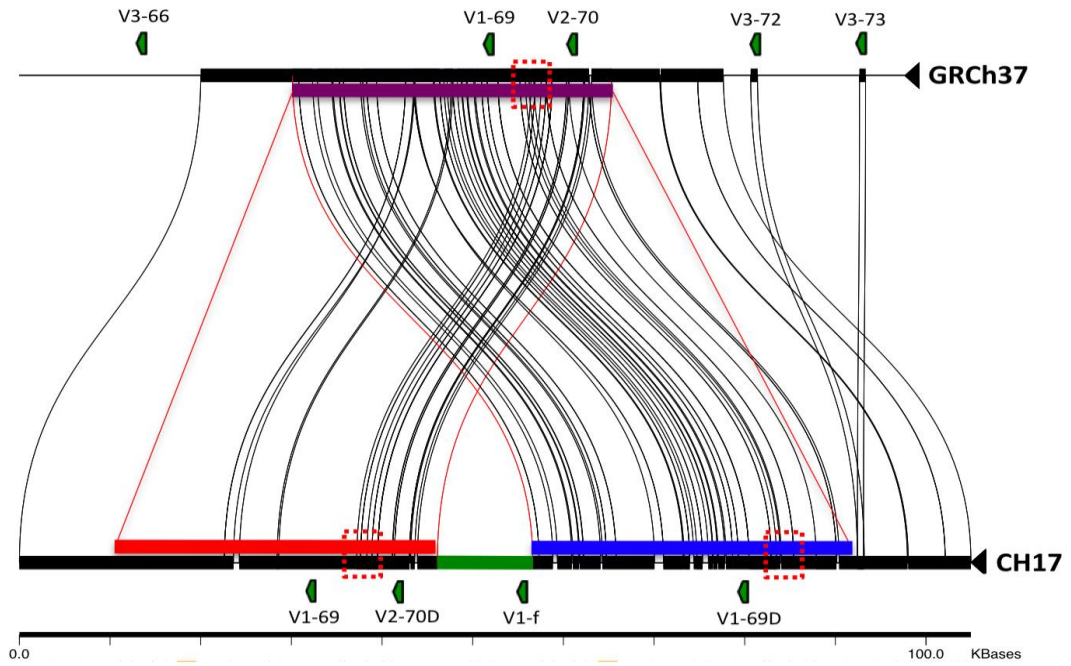

B

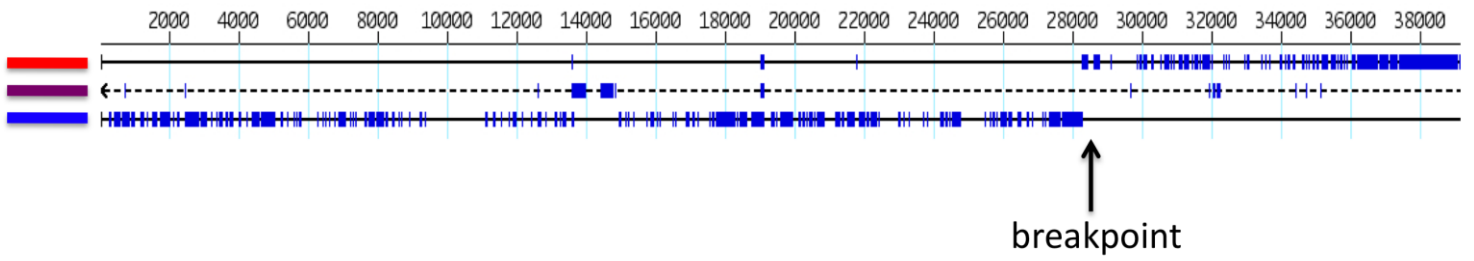

C

```
CCTTCTTCGTAGGAGTGCCCTTTCTCGTCTTTACCAAGAGCTATGCTTTTCAGCACATG
CCTTCTTCGTAGGAGTGCCCTTTCTCGTCTTTACCAAGAGCTATGCTTTTCAGCACATG
CCTTCTTCGTAGGAGTGCCCTTTCTCGTCTTTACCAAGAGCTATGCTTTTCAGGATATG
***** *.,*****

GGTGACTCTTATCTCTCTTTTCACTCATTTTCTTAAGCTGCTAGGGAGAATAAAGTGT
GGTGACTCTTATCTCTCTTTTCACTCATTTTCTTAAGCTGCTAGGGAGAATAAAGTGT
GGATGGCTGTAACCTT-----
**:*.,** *:* *

CAGGTCTATTTTGGTGCCTTGATGCTGATGAATTAAGGTTTATCTCCCTCATCCTTG
CAGGTCTATTTTGGTGCCTTGATGCTGATGAATTAAGGTTTATCTCCCTCATCCTTG
-----GATAAAAATAAACTCTCACTTTCT--
.,**:*.,**:* *:* *

TCCCCACACATGGGAAATCTAGTAAGAAATCATGGAAGCTCCCTCATGTGATGTCAGTG
TCCCCACACATGGGAAATCTAGTAAGAAATCATGGAAGCTCCCTCATGTGATGTCAGTG
-----

TGAGGTTTAAATCACACAAGCTCCTTCTCCTGAGTAGAAACGCCCCCCCCCCCCGCCG
TGAGGTTTAAATCACACAAGCTCCTTCTCCTGAGTAGAAACG-CCCCCCCCCCCCGCCG
-----

ACCCACCACCAAATCATTATAAAGCCCTGAGCCAGCCTCCTTTCTGCTCTACTGAGGA
ACCCACCACCAAATCATTATAAAGCCCTGAGCCAGCCTCCTTTCTGCTCTACTGAGGA
-----A
*

AATCCAATCTGTAATTTCTTGAGAGGACTGTGCTGCTCAGCAGACACCTCAGAAATA
AATCCAATCTGTAATTTCTTGAGAGGACTGTGCTGCTCAGCAGACACCTCAGAAATA
AATGTAGATTGTGTTTTTTT-----
**** *.,: ***,**:* *

GAGCTAATAAATCTTTTCAATTCACCTGGAGTGTGAGTGTGAAACATCAAACCTCGACA
GAGCTAATAAATCTTTTCAATTCACCTGGAGTGTGAGTGTGAAACATCAAACCTCGACA
-----TTTTTATTTAACACAAGTAAATTCGGAAGT-----
:* **:* :*: ***,**:* *.,** *

TCCACACTAACCATTTGGTGGGGTCTCTCTCCTTTGCTGGCATCACCTACAATGGAAC
TCCACACTAACCATTTGGTGGGGTCTCTCTCCTTTGCTGGCATCACCTACAATGGAAC
-----TCACCTAATTATAAGGC
*****.,**:*.,**:*

TGTGGATTGGAGTCTGACAAATGACCACCACGGGGCTTTCTTCTTTGCACTGGATGC
TGTGGATTGGAGTCTGACAAATGACCACCACGGGGCTTTCTTCTTTGCACTGGATGC
TA-----CTTGCATGGATGC
*.,

TAACTCCTCTGCCCAATGCCAGCATGCTCATTATCCTGGCTGCTGCTGGCTGGCCTT
TAACTCCTCTGCCCAATGCCAGCATGCTCATTATCCTGGCTGCTGCTGGCTGGCCTT
TAACTCCTCTGCCCAATGCCAGCATGCTCATTATCCTGGCTGCTGCTGGCTGGCCTT
***** ***,**:* :*: ***,**:* :*: ***,**:* :*.,** *

TGGAGTTCTGTTGAGCTGGGCTGCAATGCTGAGTTAAACACTGCACC-TTTATAGATTTA
TGGAGTTCTGTTGAGCTGGGCTGCAATGCTGAGTTAAACACTGCACC-TTTATAGATTTA
TGGAGTTCTGTTGAGCTGGGCTGCAATGCTGAGTTAAACACTGCACC-TTTATAGATTTA
***** ***,**:* :*: ***,**:* :*.,** *

GCTGATTAACCTCAGAAGCATTGATAACTTATTGACATTGAGAAACAGGAGTAAGTGACT
GCTGATTAACCTCAGAAGCATTGATAACTTATTGACATTGAGAAACAGGAGTAAGTGACT
GCTGATTAACCTCAGAAGCATTGATAACTTATTGACATTGAGAAACAGGAGTAAGTGACT
***** ***,**:* :*: ***,**:* :*.,** *
```

**Figure S7. Breakpoint analysis of *IGHV2-70D*, *IGHV3-h*, *IGHV1-f*, and *IGHV1-69D* insertion.** (A) Sequence comparison between ~100 kbp segments from CH17 and GRCh37 reference sequence within the region spanning *IGHV1-69* and *IGHV2-70* (chr14:107121936-107217468). The positions of *IGHV* genes in GRCh37 are shown in the top panel (red boxes), with gene name labels indicated on the right. The black bars seen on both haplotypes connected by thin black lines represent regions of shared sequence. The purple, red, and blue bars connected by thin red lines represent a ~38 kbp segment that is shared between the two haplotypes, the structure of which is indicative of a segmental duplication, as it is observed twice in the CH17 haplotype (red and blue bars) and once in GRCh37 (purple bar); these segments include copies of *IGHV1-69*, *IGHV2-70*, and either the pseudogene *IGHV3-71* (not depicted) or the pseudogene *IGHV3-h* (not depicted). The segmental duplications in CH17 are split by a region of sequence that is novel to CH17 (green bar), which includes the previously unmapped gene *IGHV1-f*. Functional and ORF genes in CH17 are depicted by green chevrons. The sequence identity between the two segmental duplications in CH17 is 94%, thus, like in the case of the *IGHV3-23* duplication, this segmental duplicate most likely served as substrate for a deletion to occur in the CH17 haplotype, giving rise to the haplotype observed in GRCh37 with a loss of *IGHV1-69D* and *IGHV2-70D*, as well as *IGHV1-f* and *IGHV3-h*. The predicted breakpoints in each haplotype are indicated by red boxes. (B) A three-way alignment of the ~38 kbp segmental duplicates from both haplotypes is shown, based on purple, red, and blue bars shown in (A). Alignment bp positions are shown along the top of the diagram. Each sequence is represented by a single horizontal black line. Blue tick marks on each line indicate nucleotide differences and gaps observed between the aligned sequences. The red line tracks the most similar alignment of the middle GRCh37 duplicate sequence to the other two sequences from CH17. Based on nucleotide similarity, the event breakpoint (black arrow) is presumed to have occurred within an 13 bp region in which all aligned sequences share 100% sequence identity, which is depicted at nucleotide resolution in (C). (C) In this image, the red and blue lines depict the best pairwise sequence alignments between the three sequences, as depicted by red line in (B). The red box indicates 13 bp region where all three sequences align perfectly at predicted breakpoint.

A

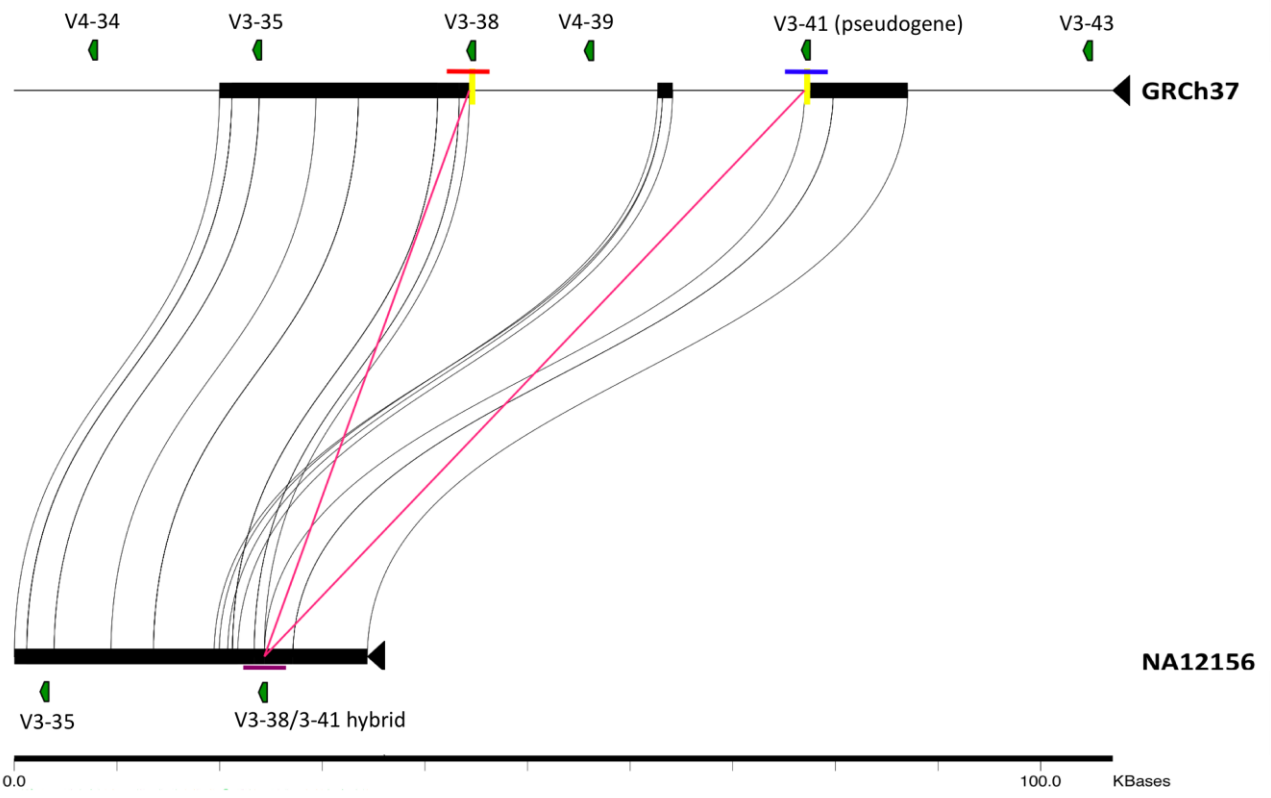



**Figure S8. Breakpoint analysis of *IGHV3-38* and *IGHV4-39* deletion.** (A) Sequence comparison between fosmid clone AC244497 from individual NA12156 to GRCh37 in the region spanning *IGHV3-34* to *IGHV3-43* depicting a deletion of *IGHV4-39* and *IGHV3-38*, the breakpoints of which are different from those predicted previously (Chimge et al., 2005). The positions of *IGHV* genes in GRCh37 and the NA12156 haplotype are depicted as green chevrons with gene name labels indicated above. The black bars seen on both haplotypes connected by thin black lines represent regions of shared sequence, with the thin red connecting lines indicating the positions of the predicted breakpoints from the comparison of the two haplotypes. The shorter horizontal red, blue, and purple lines represent the regions of the predicted breakpoints in the fosmid (purple) and reference genome (red and blue). (B) A three-way sequence alignment based on sequences from each of these breakpoints, indicated by three colored lines (red, blue, and purple) corresponding to those shown in (A). In this image the red and blue lines depict the best pairwise sequence alignments between the three sequences. The red box indicates the 24 bp region where all three sequences align perfectly at the predicted breakpoint. The gene *IGHV3-38* and pseudogene *IGHV3-41* are included in the regions of extended homology (*i.e.*, within the shown aligned sequences).



A

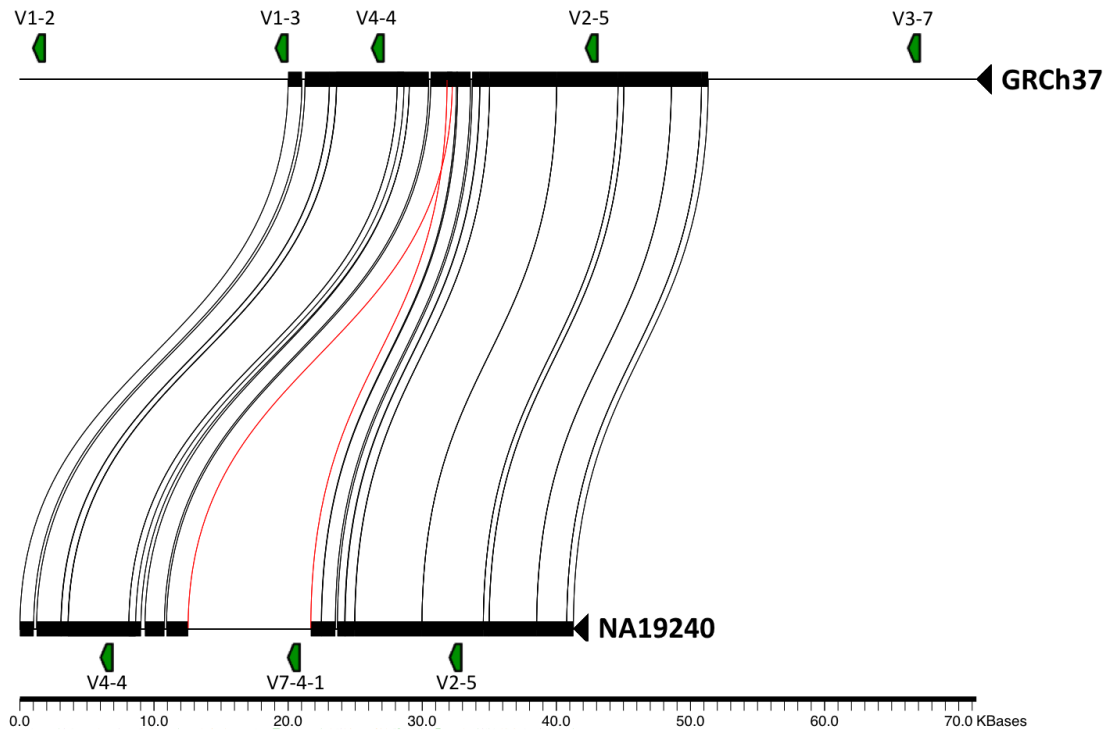

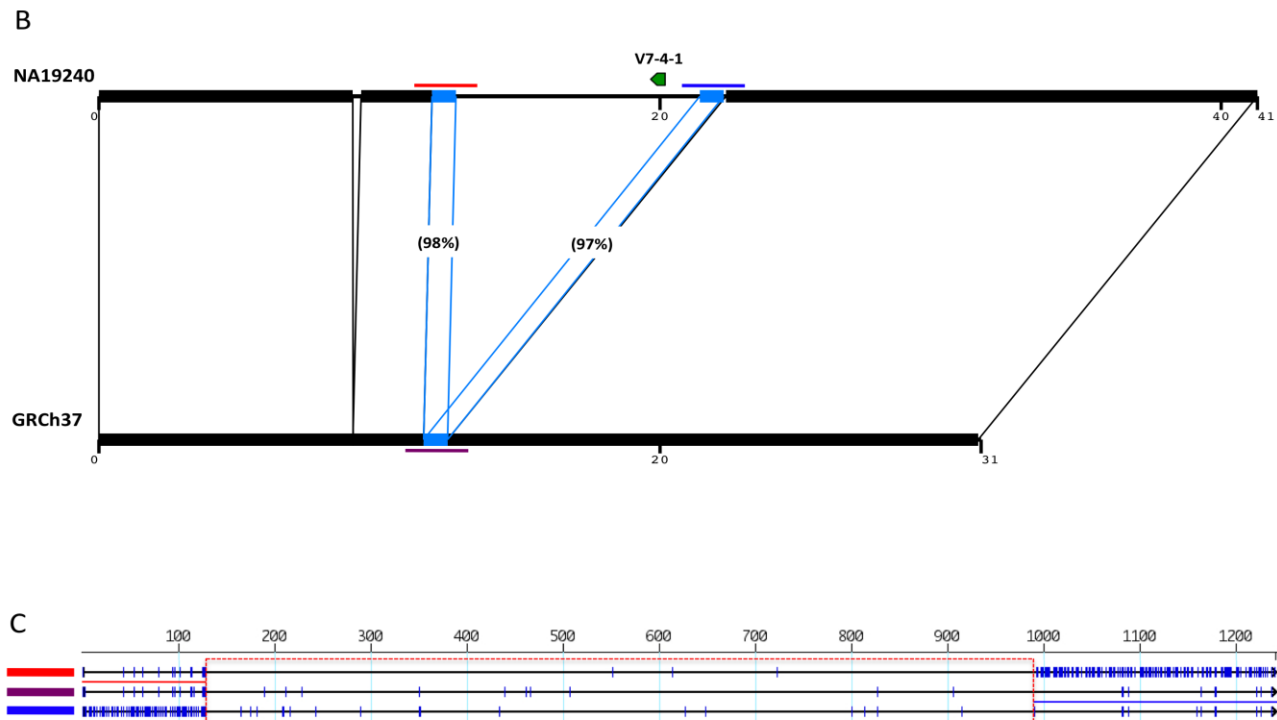

**Figure S9. Breakpoint analysis of the *IGHV7-4-1* insertion.** (A) Sequence comparison between fosmid clone AC241513 (individual NA19240) and GRCh37 in the region spanning *IGHV1-2* to *IGHV4-4*. *IGHV* genes in GRCh37 and the NA19240 haplotype are depicted as green chevrons, with gene names indicated above each gene. The black bars seen on both haplotypes connected by thin black lines represent regions of shared sequence, with the thin red connecting lines indicating the positions of the predicted breakpoints from the comparison of the two haplotypes. (B) Image showing the same alignment as in (A). Again, the black bars on both haplotypes connected by thin black lines represent regions of shared sequence; however, also shown is a ~860 bp repeat segment identified by BLAST, which occurs at the predicted breakpoint. This segment is repeated twice in the fosmid haplotype, but only once in the reference assembly. The sequence identities between each segment found in the fosmid haplotype and that in the reference genome are indicated in parentheses. The horizontal red, blue, and purple lines spanning the regions of the predicted breakpoints in the fosmid (red and blue) and reference genome (purple) are shown and represent the positions of the sequences used in the alignment shown in C. (C) A three-way alignment of sequences spanning the breakpoints in the fosmid and reference assembly, indicated by red, blue, and purple lines, corresponding to those shown in B. In the image, each sequence is represented by a single horizontal black line, and blue tick marks on each line indicate nucleotide differences and gaps observed between the aligned sequences. The red and blue lines between the sequences in the image depict the best pairwise sequence alignments between the three sequences. The red box indicates the ~860 bp region (shown in B) where all three sequences align with high similarity. Although these data indicate that the event breakpoint is predicted to occur within this 860 bp region, sequence similarity data do not allow for the exact breakpoints to be identified. Similar results were observed for the *IGHV7-4-1* insertions identified from CH17 and NA12878.

A

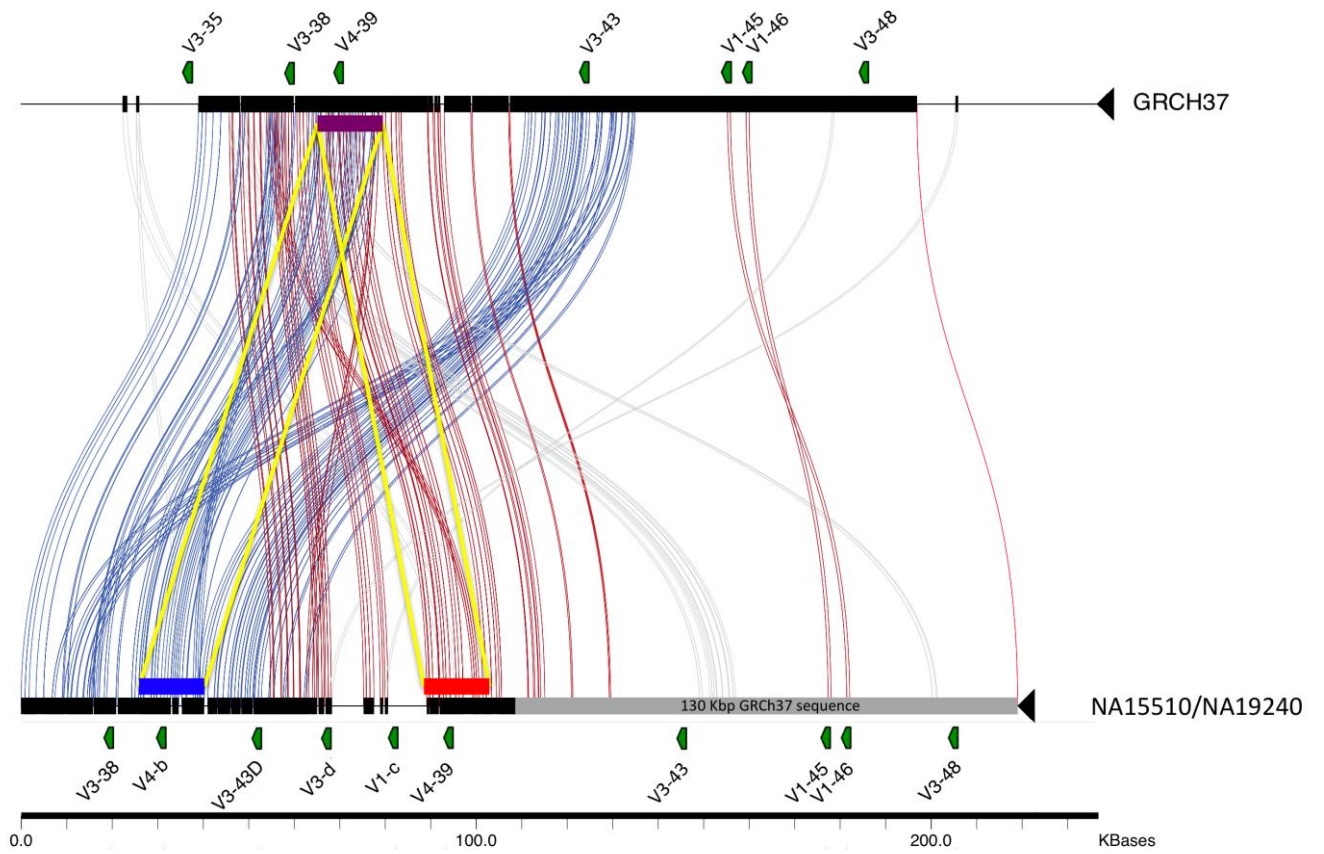

B

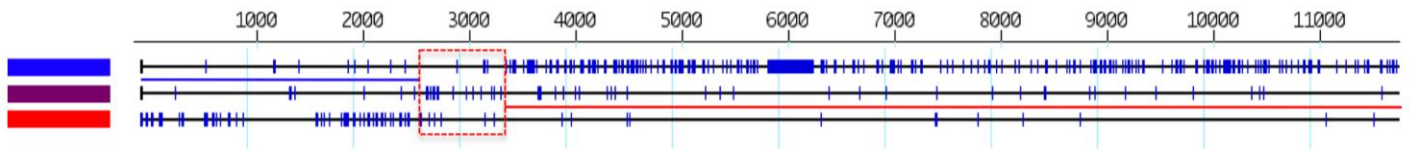

**Figure S10. Breakpoint analysis of the *IGHV4-b*, *IGHV3-43D*, *IGHV3-d* and *IGHV1-c* insertion.** (A) Image of sequence comparison between GRCh37 in the region spanning *IGHV3-35* to *IGHV3-48* to a haplotype characterized from fosmid clones of NA15510/NA19240, depicting a complex insertion of the genes *IGHV4-b*, *IGHV3-43D*, *IGHV3-d*, and *IGHV1-c*. For the construction of this image, approximately 130 Kbp of sequence from GRCh37 (gray bar) was added to the NA15510/NA19240 haplotype, so that the duplication structure of the region could be better visualized, in particular, the duplication blocks containing *IGHV3-43* and *IGHV3-43D*. The positions of IGHV genes in GRCh37 and the haplotype constructed from fosmid sequences are shown as green chevrons. The black bars shown on both haplotypes connected by thin blue, red, and black lines represent regions of shared sequence and reflect the complex duplication structure in the region. As shown, the NA15510/NA19240 haplotype insertion contains duplicated sequence of *IGHV4-39*, *IGHV3-38*, *IGHV3-43*, and flanking sequences and provides evidence that *IGHV4-b* and *IGHV3-d* are close paralogs of *IGHV4-39* and *IGHV3-38*, and *IGHV3-43D* and flanking sequences are duplicated from the *IGHV3-43* gene region. Red, blue, and purple blocks, connected by yellow lines, depict 11.7 kbp segmental duplications (identified by BLAST) found twice in the fosmid haplotype and once in the reference. (B) A three-way alignment of these segmental duplications indicates they are likely to have mediated this event, although the exact breakpoints cannot be identified. In the image (B), each sequence is represented by a single horizontal black line, and blue tick marks on each line indicate nucleotide differences and gaps observed between the aligned sequences. The red and blue lines between the sequences depict the best pairwise sequence alignments between the three sequences. The red box indicates a ~800 bp region within which the reference duplicate shows low sequence similarity with both duplicates of the fosmid haplotype, inhibiting the identification of event breakpoints within this sequence; however, the patterns of sequence similarity between the reference and fosmid segmental duplicates on either side of the red box suggest that the event crossover was likely to have occurred within this segment. Nucleotide differences seen between the three sequences in this region may reflect the accumulation of mutations following the formation of the variant, implying that this event could be older than the other insertion/deletions examined in this study. However, further sequencing will be required to address this hypothesis.

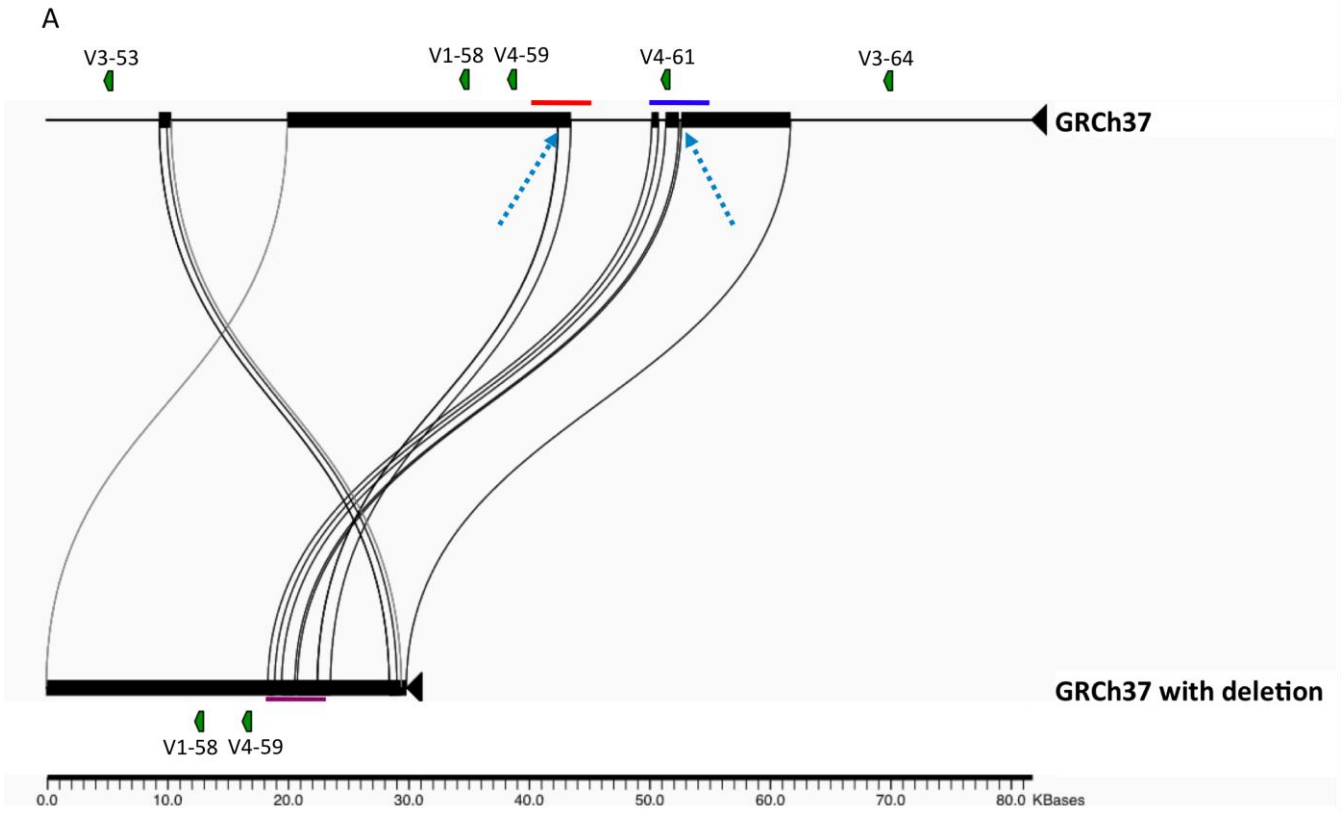

B

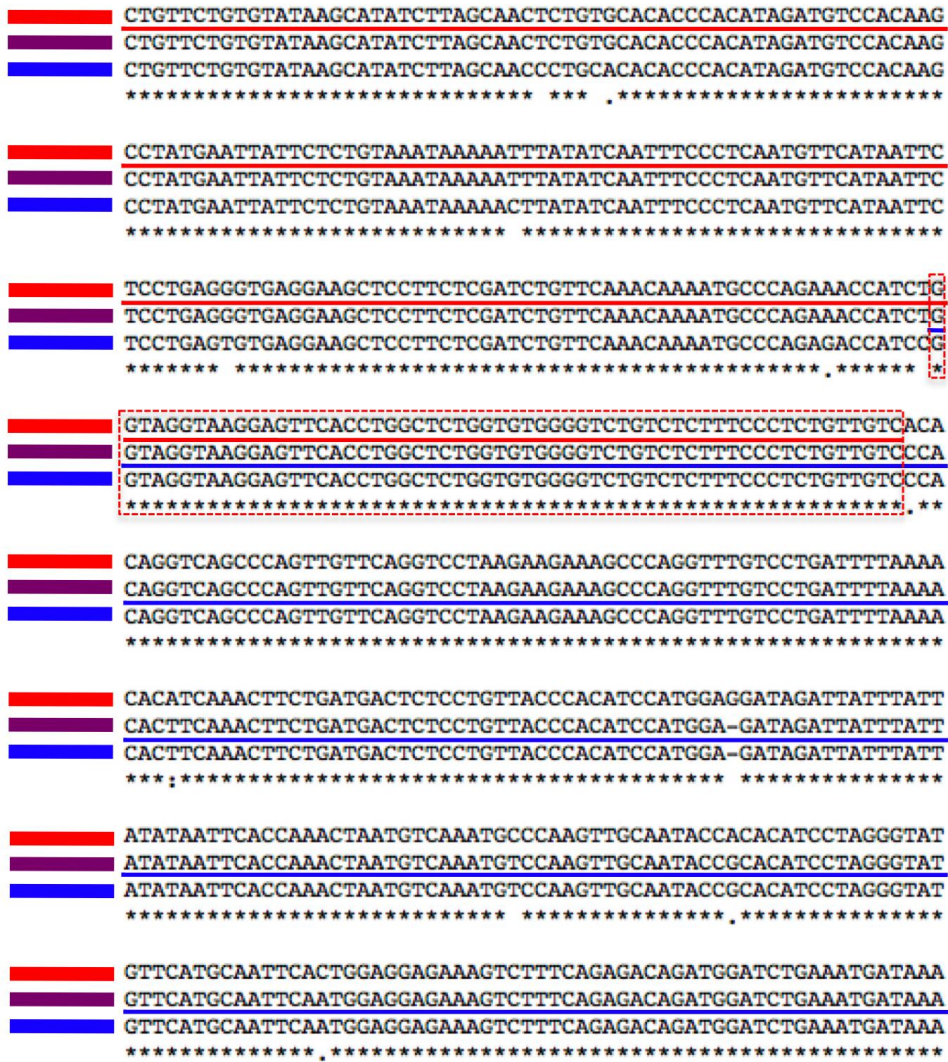

**Figure S11. Breakpoint analysis of the *IGHV4-61* deletion.** (A) Image depicting the *IGHV4-61* deletion identified by Mills *et al.* (2011)(chr14:107084861-107096738). The sequence comparison shows GRCh37 in the region spanning *IGHV3-53* to *IGHV3-64* to a “dummy” haplotype using GRCh37 sequence with the *IGHV4-61* sequence masked out, based on previously identified breakpoints (Mills *et al.*, 2011). The positions of IGHV genes in GRCh37 are shown in the top panel (red boxes), with gene name labels indicated on the right. The black bars shown on both haplotypes connected by thin blue and black lines represent regions of shared sequence. Blue dotted arrows indicate the breakpoints of the event in the modified GRCh37 haplotype. Red, blue, and purple horizontal lines represent sequences spanning breakpoints (blue dotted arrows) in each haplotype aligned in B. (B) A three-way alignment spanning the breakpoints of this event. The red and blue lines depict the best pairwise sequence alignments between the three sequences, and the red box indicates the 58 bp region where all three sequences align perfectly at the predicted breakpoint. In the image (B), each sequence is represented by a single horizontal black line, and blue tick marks on each line indicate nucleotide differences and gaps observed between the aligned sequences. Two 5.6 kbp duplication segments (0.95% identity) containing the genes *IGHV4-59* and *IGHV4-61* and the pseudogenes *IGHV3-60* and *IGHV3-62* were identified at the breakpoints using BLAST (not depicted here).

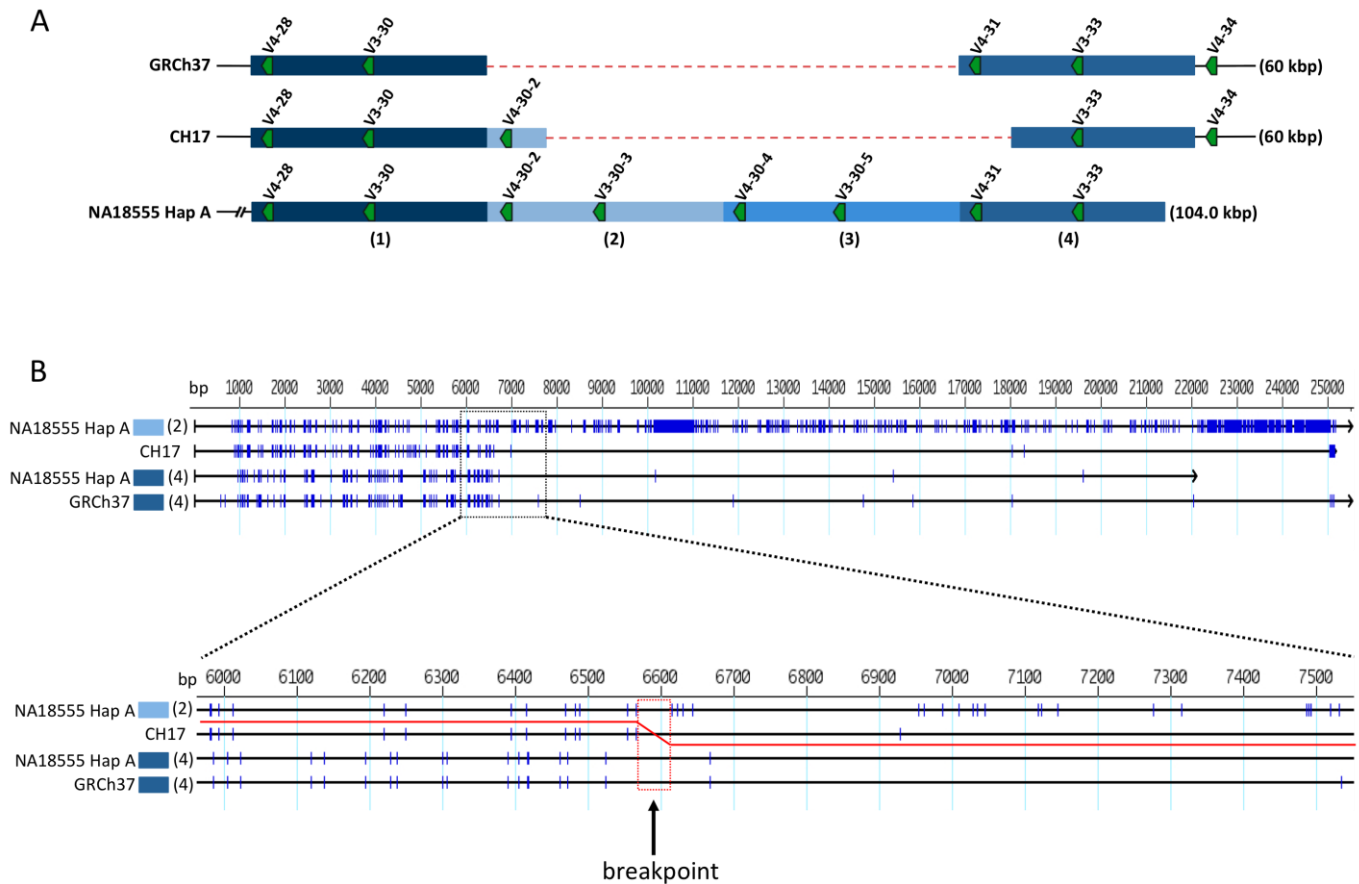

**Figure S12. Breakpoint analysis of the CH17 Haplotype complex event.**

(A) Depicts GRCh37, CH17, and NA18555 Haplotype A (also see Figure 4, main text). The haplotypes shown were determined using the method described in the Materials and Methods (main text) and Figure S1. Red dotted lines represent deletions compared to NA18555 Haplotype A. (B) This image shows an expanded and zoomed-in version of a multi-sequence alignment containing sequences of the ~25 kbp segmental duplicates (shown in panel A) from GRCh37, CH17, and NA18555 Haplotype A. Alignment by positions are shown along the top of the diagram. Each sequence is represented by a single horizontal black line, labelled with a haplotype name and the duplication block color and number corresponding to those shown in panel A. Blue tick marks on each line indicate single nucleotide differences and gaps between a given sequence and all other sequences in the alignment. The red line tracks the most similar alignments of the middle CH17 sequence to the other three sequences from GRCh37 and NA18555 Haplotype A. Based on changes in nucleotide similarity on either side of the red box (bottom panel), the event breakpoint is presumed to have occurred within a 47 bp region in which all aligned sequences share 100% sequence identity. Importantly, if this event had simply been compared to GRCh37, it is likely that this variant would have been mischaracterized.

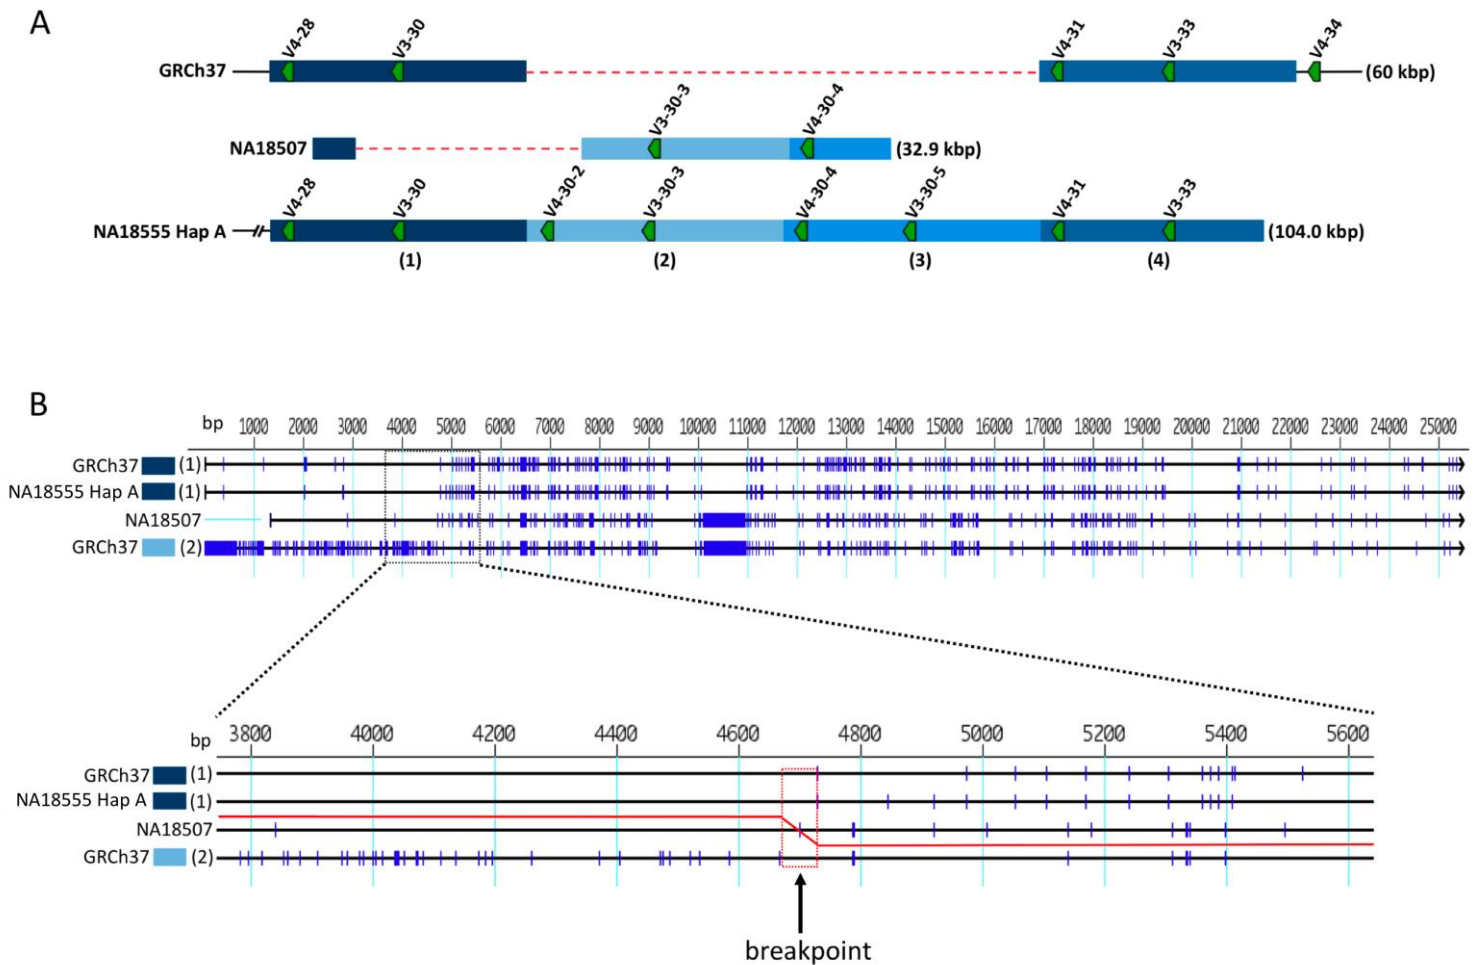

**Figure S13. Breakpoint analysis of the NA18507 Haplotype complex event.**

Depicts GRCh37, NA18507, and NA18555 Haplotype A (also see Figure 4, main text). The haplotypes shown were determined using the method outlined in the Materials and Methods (main text) and Figure S1. (B) This image shows an expanded and zoomed-in version of a multi-sequence alignment containing sequences of the ~25 kbp segmental duplicates (shown in panel A) from GRCh37, NA18507, and NA18555 Haplotype A. Alignment bp positions are shown along the top of the diagram. Each sequence is represented by a single horizontal black line, labelled with haplotype name and the duplication block color and number corresponding to those shown in panel A. Blue tick marks on each line indicate single nucleotide differences and gaps between a given sequence and all other sequences in the alignment. The red line tracks the most similar alignments of the middle NA18507 sequence to the other three sequences from GRCh37 and NA18555 Haplotype A. Based on changes in nucleotide similarity on either side of the red box (bottom panel), the event breakpoint is presumed to have occurred within a 61 bp region in which all aligned sequences share 98% sequence identity.



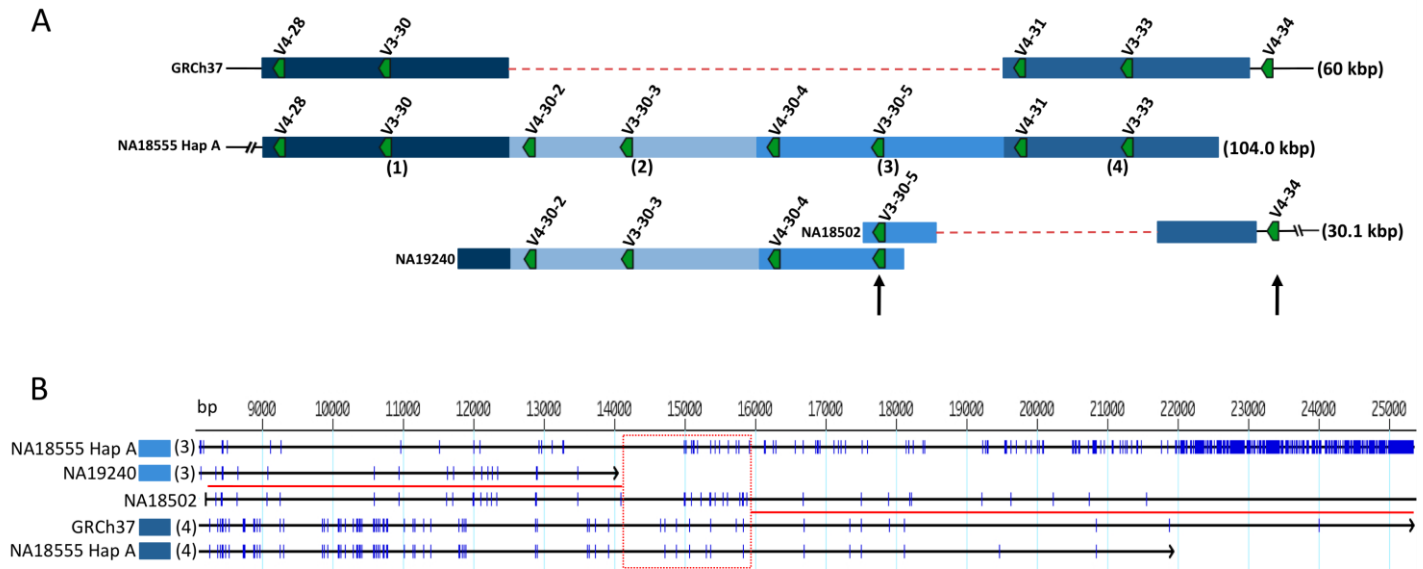

**Figure S14. Breakpoint analysis of NA18502 Haplotype complex event.**

(A) Depicts a GRCh37, NA18555 Haplotype A, NA18502, and NA19240 clone AC234301 (also see Figure 4, main text). The haplotypes shown were determined using the method described in the Materials and Methods (main text) and Figure S1 above. Black arrows indicate gene synteny between the NA18502 haplotype and other haplotypes in the comparison. (B) This image shows a multi-sequence alignment containing sequences from a portion of the ~25 kbp segmental duplicates from GRCh37, NA18555 Haplotype A, and NA19240 clone AC234301 that overlap the NA18502 haplotype (see panel A). Alignment bp positions are shown along the top of the diagram. Each sequence is represented by a single horizontal black line, labelled with a haplotype name and the duplication block color and number corresponding to those shown in panel A. Blue tick marks on each line indicate single nucleotide differences and gaps between a given sequence and all other sequences in the alignment. The red line tracks the most similar alignments of the middle NA18502 haplotype sequence to the other four sequences in the alignment. The NA19240 clone AC234301, although only a partial haplotype, was used to inform the placement of NA18502 based on their sequence similarity in segmental duplication block 3. Both haplotypes are from individuals of the Yoruban population, and thus shared SNPs that differentiate these haplotypes from duplication block 3 in NA18555 Haplotype A are likely an example of population-specific nucleotide variation. Such variation inhibits the delineation of breakpoints for this event; nonetheless, the breakpoint is predicted to have occurred within the red box, based on changes in nucleotide similarity on either side of this box. Additional haplotype resequencing in this region from African populations would likely improve resolution with respect to tracking the crossover events associated with this variant. Again, as noted in Figure S12 for CH17, it is likely that the NA18502 would have been mischaracterized if only analyzed in the context of GRCh37.

| Clone Name                        | Accession | Sample ID | Library | Pop | Chr   | Start     | End       | Variants                              |
|-----------------------------------|-----------|-----------|---------|-----|-------|-----------|-----------|---------------------------------------|
| ABC7_000043068300_J5              | AC244483  | NA18517   | ABC7    | YRI | chr14 | 106298007 | 107175503 | somatic rearrangement                 |
| ABC7_000042374900_I23             | AC244478  | NA18517   | ABC7    | YRI | chr14 | 106611603 | 106842070 | mismapped end sequences               |
| ABC8_000041787500_L13             | AC244410  | NA18507   | ABC8    | YRI | chr14 | 106183100 | 106505148 | somatic rearrangement                 |
| ABC8_000043241700_M22             | AC244412  | NA18507   | ABC8    | YRI | chr14 | 106196182 | 106507379 | somatic rearrangement (not annotated) |
| ABC8_000040989700_P12             | AC244459  | NA18507   | ABC8    | YRI | chr14 | 106199798 | 106683306 | somatic rearrangement                 |
| 168825_ABC8_4_1_000000787522_D4   | AC244496  | NA18507   | ABC8    | YRI | chr14 | 106304430 | 107025286 | somatic rearrangement                 |
| ABC8_000000718240_A7              | AC244411  | NA18507   | ABC8    | YRI | chr14 | 106780964 | 106789660 | V4-28 to V4-34 region complex indel   |
| ABC8_000005713749_P16             | AC244460  | NA18507   | ABC8    | YRI | chr14 | 107091316 | 107111772 | no variant                            |
| 170215_ABC9_3_2_000043829600_C23  | AC244396  | NA18956   | ABC9    | JPT | chr14 | 106174436 | 106327048 | somatic rearrangement (not annotated) |
| 170215_ABC9_3_2_000041260500_H2   | AC244491  | NA18956   | ABC9    | JPT | chr14 | 106175047 | 106327110 | somatic rearrangement (not annotated) |
| 170215_ABC9_3_2_000041282600_M4   | AC244399  | NA18956   | ABC9    | JPT | chr14 | 106178228 | 106809945 | somatic rearrangement (not annotated) |
| 170215_ABC9_3_2_000043834200_J7   | AC244400  | NA18956   | ABC9    | JPT | chr14 | 106178814 | 106364907 | somatic rearrangement (not annotated) |
| 170215_ABC9_3_2_000041279400_F8   | AC244487  | NA18956   | ABC9    | JPT | chr14 | 106193084 | 106380204 | somatic rearrangement (not annotated) |
| 170215_ABC9_3_2_000046007900_D17  | AC244397  | NA18956   | ABC9    | JPT | chr14 | 106193099 | 106380194 | somatic rearrangement (not annotated) |
| 172343_ABC9_3_5_000046294400_K6   | AC244398  | NA18956   | ABC9    | JPT | chr14 | 106203239 | 106837343 | somatic rearrangement (not annotated) |
| 172343_ABC9_3_5_000043993300_H10  | AC206018  | NA18956   | ABC9    | JPT | chr14 | 106689750 | 106718606 | V3-23 duplication                     |
| 170215_ABC9_3_2_000043849600_N9   | AC244473  | NA18956   | ABC9    | JPT | chr14 | 106726513 | 106758523 | V3-23 duplication                     |
| 170215_ABC9_3_2_000041239600_E19  | AC244395  | NA18956   | ABC9    | JPT | chr14 | 106917878 | 106948696 | no variant                            |
| 174222_ABC10_2_1_000044551900_K9  | AC244480  | NA19240   | ABC10   | YRI | chr14 | 106037759 | 106192107 | somatic rearrangement (not annotated) |
| 173650_ABC10_2_1_000044117600_K12 | AC244470  | NA19240   | ABC10   | YRI | chr14 | 106060871 | 106499156 | somatic rearrangement                 |
| 173650_ABC10_2_1_000044141400_O24 | AC244495  | NA19240   | ABC10   | YRI | chr14 | 106183931 | 106341954 | somatic rearrangement (not annotated) |
| 174552_ABC10_2_1_000044789200_G15 | AC244482  | NA19240   | ABC10   | YRI | chr14 | 106327549 | 106532103 | somatic rearrangement                 |
| 173650_ABC10_2_1_000044509600_J4  | AC241513  | NA19240   | ABC10   | YRI | chr14 | 106471831 | 106503095 | V7-4-1 insertion                      |
| 174552_ABC10_2_1_000044748900_N6  | AC244463  | NA19240   | ABC10   | YRI | chr14 | 106543383 | 106573224 | no variant                            |

|                                    |          |         |       |     |       |           |           |                                       |
|------------------------------------|----------|---------|-------|-----|-------|-----------|-----------|---------------------------------------|
| 174552_ABC10_2_1_000001587670_O14  | AC244430 | NA19240 | ABC10 | YRI | chr14 | 106543403 | 106573227 | no variant                            |
| 174552_ABC10_2_1_000044687300_P14  | AC234301 | NA19240 | ABC10 | YRI | chr14 | 106792347 | 106801572 | V4-28 to V4-34 region complex indel   |
| 173650_ABC10_2_1_000044084700_I10  | KC162926 | NA19240 | ABC10 | YRI | chr14 | 106846461 | 106921833 | V4-b, V3-43D, V3-d, V1-c insertion    |
| 173650_ABC10_2_1_000044145400_L1   | AC233755 | NA19240 | ABC10 | YRI | chr14 | 106881362 | 106937986 | V4-b, V3-43D, V3-d, V1-c insertion    |
| 174552_ABC10_2_1_000001585770_E3   | AC234135 | NA19240 | ABC10 | YRI | chr14 | 107159176 | 107165232 | V1-69D, V1-f, V3-h, V2-70D insertion  |
| 1201894_ABC11_2_1_000049604900_H9  | AC244405 | NA18555 | ABC11 | CHB | chr14 | 106148239 | 106887042 | somatic rearrangement (not annotated) |
| 1200277_ABC11_2_1_000048179600_D4  | AC244467 | NA18555 | ABC11 | CHB | chr14 | 106163452 | 107103691 | somatic rearrangement                 |
| 1200277_ABC11_2_1_000048290000_H9  | AC244500 | NA18555 | ABC11 | CHB | chr14 | 106164280 | 106900701 | somatic rearrangement                 |
| 1201894_ABC11_2_1_000048039500_G23 | AC244481 | NA18555 | ABC11 | CHB | chr14 | 106326549 | 106850130 | somatic rearrangement                 |
| 1201894_ABC11_2_1_000048019600_E23 | AC244464 | NA18555 | ABC11 | CHB | chr14 | 106756521 | 106820610 | V4-28 to V4-34 region complex event   |
| 1200277_ABC11_2_1_000047355000_A14 | KC162924 | NA18555 | ABC11 | CHB | chr14 | 106770972 | 106812962 | V4-28 to V4-34 region complex event   |
| 1201894_ABC11_2_1_000049598600_E10 | KC162925 | NA18555 | ABC11 | CHB | chr14 | 106785862 | 106825714 | V4-28 to V4-34 region complex event   |
| 1200277_ABC11_000047150400_I4      | AC231260 | NA18555 | ABC11 | CHB | chr14 | 106787111 | 106801207 | V4-28 to V4-34 region complex event   |
| 1200277_ABC11_2_1_000047354200_D2  | AC244456 | NA18555 | ABC11 | CHB | chr14 | 106788077 | 106804909 | V4-28 to V4-34 region complex event   |
| 1200277_ABC11_2_1_000048009100_A5  | AC244477 | NA18555 | ABC11 | CHB | chr14 | 106978743 | 107012102 | no variant                            |
| 174779_ABC12_000048925600_G6       | AC245090 | NA12878 | ABC12 | YRI | chr14 | 106474006 | 106503223 | V7-4-1 insertion                      |
| 174779_ABC12_000046655100_E11      | AC244490 | NA12878 | ABC12 | YRI | chr14 | 107246863 | 107279721 | no variant                            |
| 1209408_ABC14_4_1_000050109000_A2  | AC244484 | NA12156 | ABC14 | CEU | chr14 | 106067185 | 106203209 | somatic rearrangement (not annotated) |
| 1207854_ABC14_4_1_000000945814_H10 | AC244494 | NA12156 | ABC14 | CEU | chr14 | 106067187 | 106203209 | somatic rearrangement (not annotated) |
| 1207854_ABC14_4_1_000001038114_M15 | AC244486 | NA12156 | ABC14 | CEU | chr14 | 106067188 | 106203215 | somatic rearrangement (not annotated) |
| 1207854_ABC14_4_1_000000947614_C21 | AC244488 | NA12156 | ABC14 | CEU | chr14 | 106196455 | 106897980 | somatic rearrangement                 |
| 1207854_ABC14_4_1_000000954514_B22 | AC244492 | NA12156 | ABC14 | CEU | chr14 | 106717227 | 106747270 | V3-23 duplication                     |
| 1210216_ABC14_4_1_000050416300_K24 | AC244476 | NA12156 | ABC14 | CEU | chr14 | 106821728 | 106837355 | no variant                            |
| 1207854_ABC14_4_1_000001051114_P8  | AC244497 | NA12156 | ABC14 | CEU | chr14 | 106842036 | 106909061 | V4-39 and V3-38 deletion              |
| 1207856_ABC14_6_1_000000986905_I21 | AC244468 | NA12156 | ABC14 | CEU | chr14 | 106990476 | 107035740 | no variant                            |
| H_HN-0366M09                       | AC245243 | NA18502 | ABC24 | YRI | chr14 | 107083960 | 107133221 | V4-28 to V4-34 region complex event   |
| G248P82590E10                      | AC244393 | NA15510 | G248  | NA  | chr14 | 106080189 | 106215603 | somatic rearrangement (not annotated) |

|               |          |         |      |    |       |           |           |                                                        |
|---------------|----------|---------|------|----|-------|-----------|-----------|--------------------------------------------------------|
| G248P89855C11 | AC244450 | NA15510 | G248 | NA | chr14 | 106086128 | 106223924 | somatic rearrangement (not annotated)                  |
| G248P801347C7 | AC244449 | NA15510 | G248 | NA | chr14 | 106219577 | 106398180 | somatic rearrangement (not annotated)                  |
| G248P86528D1  | AC241995 | NA15510 | G248 | NA | chr14 | 106864253 | 106891653 | V4-b, V3-43D, V3-d, V1-c insertion                     |
| G248P802396B6 | AC234225 | NA15510 | G248 | NA | chr14 | 106881362 | 106937986 | V4-b, V3-43D, V3-d, V1-c insertion                     |
| CH17-185P21   | AC246787 | CH17    | CH17 | NA | chr14 | 106252705 | 106457005 | no variant                                             |
| CH17-262H11   | AC244226 | CH17    | CH17 | NA | chr14 | 106341680 | 106786536 | V7-4-1 insertion                                       |
| CH17-224D4    | AC247036 | CH17    | CH17 | NA | chr14 | 106457021 | 106667214 | V7-4-1 insertion                                       |
| CH17-76I19    | AC245085 | CH17    | CH17 | NA | chr14 | 106371554 | 106580630 | V7-4-1 insertion, V1-8, V3-9/V5-a, V3-64 complex event |
| CH17-60O17    | AC245166 | CH17    | CH17 | NA | chr14 | 106665750 | 106874148 | V4-28 to V4-34 region complex event                    |
| CH17-268I9    | AC244452 | CH17    | CH17 | NA | chr14 | 106851717 | 107090287 | V4-28 to V4-34 region complex event                    |
| CH17-212P11   | AC245369 | CH17    | CH17 | NA | chr14 | 107041060 | 107186635 | V1-69D, V1-f, V3-h, V2-70D insertion                   |
| CH17-314I7    | AC245023 | CH17    | CH17 | NA | chr14 | 107104086 | 107268418 | V1-69D, V1-f, V3-h, V2-70D insertion                   |
| CH17-226J7    | AC245094 | CH17    | CH17 | NA | chr14 | 107135811 | 107268404 | V1-69D, V1-f, V3-h, V2-70D insertion                   |

**Table S1.** Names, accessions, libraries, coordinates and variants contained within each clone presented in main text.

| Genbank Accession | Clone name  | chr | GRCh37 start | GRCh37 end | Join alignment length | Join % id | Join details                                                                                                 |
|-------------------|-------------|-----|--------------|------------|-----------------------|-----------|--------------------------------------------------------------------------------------------------------------|
| AC246787.2        | CH17-185P21 | 14  | 106252715    | 106456986  | 115128                | 100       |                                                                                                              |
| AC244226.3        | CH17-262H11 | 14  | 106341680    | 106786536  | 91177                 | 100       |                                                                                                              |
| AC247036.2        | CH17-224D4  | 14  | 106457039    | 106667195  | 1479                  | 100       | alignment length < 2000 (join supported by additional overlapping clone AC245085.2, not shown)               |
| AC245166.2        | CH17-60O17  | 14  | 106665750    | 106874148  | 22460                 | 100       |                                                                                                              |
| AC244452.3        | CH17-268I9  | 14  | 106851717    | 107090287  | 49239                 | 100       | >0 gap of 500bp or more, not simple sequence (result of segmental duplication that cannot be fully resolved) |
| AC245369.3        | CH17-212P11 | 14  | 107041060    | 107186635  | 129883                | 99.95     | >0 gap of 50bp or more, not simple sequence (result of segmental duplication that cannot be fully resolved)  |
| AC245023.2        | CH17-314I7  | 14  | 107104086    | 107268418  |                       |           |                                                                                                              |

**Table S2.** Minimal tiling path of CH17 contig with join details.

| Variant                            | Forward (5'-3')         | Reverse (5'-3')         | Probe (5'-3')       |
|------------------------------------|-------------------------|-------------------------|---------------------|
| V7-4-1 Non-insertion               | GCTTGGGGAATCAACGACCG    | TGTAGCCTACTTGATTGCAGTG  | NA                  |
| V7-4-1 Insertion                   | GCTTGGGGAATCAACGACCG    | GGGATCCTGCAAATGCCTCTG   | NA                  |
| V1-8/V3-9 (hg19)                   | AGTCTGAAATTGGGAGTCCA    | CGCATTAAACCCAGTCAGATG   | NA                  |
| V5-a/V3-64 (CH17)                  | TCTCCACACCTTGGAGCTTG    | GTGGGAGCCACAGTCAGTTC    | NA                  |
| V4-b/V3-43/V3-d/V1-c Insertion     | GATTGTGCCAGGACTCACAG    | CCCTTCATCTTGGACCTCAG    | NA                  |
| V4-b/V3-43/V3-d/V1-c Non-insertion | TGAAAATCTGAGCGATGTGC    | TGTTTCTAGGATGCAGACATGG  | NA                  |
| V1-f Insertion                     | GGGACATTTCTGTGAGTCCAG   | CCAGGAACTGATGGGGACTT    | NA                  |
| V1-69_1 Duplication                | GCTGAGGCAGGAGATTTAATCCT | CAGCTCACTGCAAACCTCTGCTT | CAAGACCTACAGCCTCAGA |

**Table S3.** Primer and probe list for breakpoint PCR and TaqMan copy number assays

| Sample ID | Population | Included in LD analysis |
|-----------|------------|-------------------------|
| NA18530   | CHB        | *                       |
| NA18534   | CHB        | *                       |
| NA18536   | CHB        | *                       |
| NA18543   | CHB        | *                       |
| NA18544   | CHB        | *                       |
| NA18546   | CHB        | *                       |
| NA18548   | CHB        | *                       |
| NA18549   | CHB        | *                       |
| NA18557   | CHB        | *                       |
| NA18559   | CHB        | *                       |
| NA18595   | CHB        | *                       |
| NA18596   | CHB        | *                       |
| NA18597   | CHB        | *                       |
| NA18599   | CHB        | *                       |
| NA18602   | CHB        | *                       |
| NA18606   | CHB        | *                       |
| NA18610   | CHB        | *                       |
| NA18613   | CHB        | *                       |
| NA18614   | CHB        | *                       |
| NA18615   | CHB        | *                       |
| NA18616   | CHB        | *                       |

|         |     |   |
|---------|-----|---|
| NA18617 | CHB | * |
| NA18618 | CHB | * |
| NA18619 | CHB | * |
| NA18625 | CHB |   |
| NA18626 | CHB | * |
| NA18627 | CHB | * |
| NA18628 | CHB | * |
| NA18630 | CHB | * |
| NA18631 | CHB | * |
| NA18634 | CHB | * |
| NA18638 | CHB | * |
| NA18639 | CHB | * |
| NA18640 | CHB | * |
| NA18641 | CHB | * |
| NA18642 | CHB | * |
| NA18643 | CHB | * |
| NA18645 | CHB | * |
| NA18647 | CHB | * |
| NA18740 | CHB | * |
| NA18745 | CHB | * |
| NA18747 | CHB | * |
| NA18748 | CHB | * |
| NA18749 | CHB | * |
| NA18757 | CHB | * |



|         |     |   |
|---------|-----|---|
| HG00174 | FIN | * |
| HG00177 | FIN | * |
| HG00178 | FIN | * |
| HG00180 | FIN | * |
| HG00181 | FIN |   |
| HG00182 | FIN | * |
| HG00183 | FIN | * |
| HG00186 | FIN | * |
| HG00188 | FIN | * |
| HG00190 | FIN | * |
| HG00271 | FIN | * |
| HG00272 | FIN | * |
| HG00277 | FIN | * |
| HG00284 | FIN | * |
| HG00285 | FIN | * |
| HG00310 | FIN | * |
| HG00311 | FIN | * |
| HG00312 | FIN | * |
| HG00313 | FIN | * |
| HG00320 | FIN | * |
| HG00323 | FIN | * |
| HG00324 | FIN | * |
| HG00325 | FIN | * |
| HG00326 | FIN | * |

|         |     |   |
|---------|-----|---|
| HG00327 | FIN | * |
| HG00329 | FIN | * |
| HG00331 | FIN | * |
| HG00334 | FIN | * |
| HG00335 | FIN | * |
| HG00336 | FIN | * |
| HG00338 | FIN | * |
| HG00341 | FIN | * |
| HG00342 | FIN | * |
| HG00343 | FIN | * |
| HG00350 | FIN | * |
| HG00351 | FIN | * |
| HG00353 | FIN | * |
| HG00355 | FIN | * |
| HG00356 | FIN | * |
| HG00360 | FIN | * |
| HG00361 | FIN | * |
| HG00368 | FIN |   |
| HG00369 | FIN | * |
| HG00372 | FIN | * |
| HG00373 | FIN | * |
| HG00380 | FIN |   |
| HG00382 | FIN | * |
| HG00383 | FIN | * |

|         |     |   |
|---------|-----|---|
| HG00097 | GBR | * |
| HG00100 | GBR | * |
| HG00103 | GBR | * |
| HG00104 | GBR | * |
| HG00106 | GBR | * |
| HG00107 | GBR |   |
| HG00108 | GBR | * |
| HG00110 | GBR | * |
| HG00111 | GBR | * |
| HG00113 | GBR | * |
| HG00115 | GBR |   |
| HG00116 | GBR | * |
| HG00117 | GBR | * |
| HG00119 | GBR | * |
| HG00120 | GBR | * |
| HG00124 | GBR | * |
| HG00128 | GBR | * |
| HG00129 | GBR | * |
| HG00130 | GBR | * |
| HG00136 | GBR | * |
| HG00139 | GBR | * |
| HG00141 | GBR | * |
| HG00142 | GBR | * |
| HG00145 | GBR |   |

|         |     |   |
|---------|-----|---|
| HG00148 | GBR | * |
| HG00149 | GBR | * |
| HG00150 | GBR | * |
| HG00151 | GBR | * |
| HG00156 | GBR | * |
| HG00231 | GBR | * |
| HG00232 | GBR | * |
| HG00234 | GBR | * |
| HG00235 | GBR | * |
| HG00236 | GBR | * |
| HG00237 | GBR | * |
| HG00238 | GBR | * |
| HG00240 | GBR | * |
| HG00243 | GBR | * |
| HG00244 | GBR | * |
| HG00247 | GBR | * |
| HG00251 | GBR | * |
| HG00253 | GBR | * |
| HG00255 | GBR | * |
| HG00256 | GBR | * |
| HG00258 | GBR | * |
| HG00262 | GBR | * |
| HG00263 | GBR | * |
| HG00264 | GBR | * |

|         |     |
|---------|-----|
| HG01500 | IBS |
| HG01501 | IBS |
| HG01503 | IBS |
| HG01506 | IBS |
| HG01507 | IBS |
| HG01509 | IBS |
| HG01510 | IBS |
| HG01513 | IBS |
| HG01515 | IBS |
| HG01516 | IBS |
| HG01525 | IBS |
| HG01527 | IBS |
| HG01530 | IBS |
| HG01531 | IBS |
| HG01602 | IBS |
| HG01612 | IBS |
| HG01613 | IBS |
| HG01615 | IBS |
| HG01619 | IBS |
| HG01624 | IBS |
| HG01625 | IBS |
| HG01626 | IBS |
| HG01631 | IBS |
| HG01672 | IBS |

|         |     |
|---------|-----|
| HG01678 | IBS |
| HG01679 | IBS |
| HG01684 | IBS |
| HG01686 | IBS |
| HG01694 | IBS |
| HG01695 | IBS |
| HG01697 | IBS |
| HG01700 | IBS |
| HG01704 | IBS |
| HG01707 | IBS |
| HG01708 | IBS |
| HG01746 | IBS |
| HG01747 | IBS |
| HG01761 | IBS |
| HG01762 | IBS |
| HG01770 | IBS |
| HG01771 | IBS |
| HG01773 | IBS |
| HG02223 | IBS |
| HG02224 | IBS |
| HG02232 | IBS |
| HG02233 | IBS |
| HG02235 | IBS |
| HG02238 | IBS |

|         |     |   |
|---------|-----|---|
| NA18939 | JPT | * |
| NA18941 | JPT | * |
| NA18946 | JPT | * |
| NA18954 | JPT | * |
| NA18955 | JPT |   |
| NA18957 | JPT | * |
| NA18962 | JPT | * |
| NA18963 | JPT | * |
| NA18977 | JPT | * |
| NA18979 | JPT |   |
| NA18993 | JPT |   |
| NA19001 | JPT |   |
| NA19002 | JPT | * |
| NA19009 | JPT | * |
| NA19010 | JPT | * |
| NA19054 | JPT | * |
| NA19055 | JPT | * |
| NA19056 | JPT | * |
| NA19057 | JPT | * |
| NA19058 | JPT | * |
| NA19059 | JPT | * |
| NA19060 | JPT | * |
| NA19062 | JPT | * |
| NA19063 | JPT | * |

|         |     |   |
|---------|-----|---|
| NA19064 | JPT | * |
| NA19065 | JPT | * |
| NA19066 | JPT | * |
| NA19067 | JPT | * |
| NA19068 | JPT | * |
| NA19070 | JPT | * |
| NA19072 | JPT | * |
| NA19074 | JPT | * |
| NA19075 | JPT | * |
| NA19076 | JPT | * |
| NA19077 | JPT | * |
| NA19078 | JPT | * |
| NA19079 | JPT | * |
| NA19080 | JPT | * |
| NA19081 | JPT | * |
| NA19082 | JPT | * |
| NA19083 | JPT | * |
| NA19084 | JPT | * |
| NA19085 | JPT | * |
| NA19086 | JPT |   |
| NA19087 | JPT | * |
| NA19088 | JPT | * |
| NA19027 | LWK |   |
| NA19028 | LWK | * |



|         |     |   |
|---------|-----|---|
| NA19035 | LWK | * |
| NA19046 | LWK | * |
| NA19307 | LWK | * |
| NA19309 | LWK | * |
| NA19310 | LWK | * |
| NA19313 | LWK | * |
| NA19315 | LWK | * |
| NA19317 | LWK | * |
| NA19321 | LWK | * |
| NA19334 | LWK | * |
| NA19347 | LWK | * |
| NA19350 | LWK | * |
| NA19352 | LWK | * |
| NA19360 | LWK | * |
| NA19372 | LWK | * |
| NA19376 | LWK | * |
| NA19377 | LWK | * |
| NA19379 | LWK | * |
| NA19380 | LWK | * |
| NA19382 | LWK | * |
| NA19383 | LWK | * |
| NA19384 | LWK | * |
| NA19390 | LWK | * |
| NA19393 | LWK | * |

|         |     |   |
|---------|-----|---|
| NA19396 | LWK | * |
| NA19397 | LWK | * |
| NA19399 | LWK | * |
| NA19403 | LWK | * |
| NA19404 | LWK | * |
| NA19431 | LWK | * |
| NA19434 | LWK | * |
| NA19435 | LWK | * |
| NA19436 | LWK | * |
| NA19438 | LWK | * |
| NA19440 | LWK | * |
| NA19444 | LWK | * |
| NA19448 | LWK | * |
| NA19451 | LWK | * |
| NA19455 | LWK | * |
| NA19456 | LWK | * |
| NA19457 | LWK | * |
| NA19463 | LWK | * |
| NA19468 | LWK | * |
| NA19470 | LWK | * |
| NA19471 | LWK | * |
| NA19472 | LWK | * |
| NA21295 | MKK |   |
| NA21297 | MKK |   |

|         |     |
|---------|-----|
| NA21306 | MKK |
| NA21333 | MKK |
| NA21336 | MKK |
| NA21339 | MKK |
| NA21352 | MKK |
| NA21353 | MKK |
| NA21355 | MKK |
| NA21368 | MKK |
| NA21371 | MKK |
| NA21417 | MKK |
| NA21418 | MKK |
| NA21420 | MKK |
| NA21434 | MKK |
| NA21435 | MKK |
| NA21436 | MKK |
| NA21448 | MKK |
| NA21451 | MKK |
| NA21473 | MKK |
| NA21491 | MKK |
| NA21509 | MKK |
| NA21510 | MKK |
| NA21520 | MKK |
| NA21529 | MKK |
| NA21577 | MKK |

|         |     |   |
|---------|-----|---|
| NA21578 | MKK |   |
| NA21582 | MKK |   |
| NA21587 | MKK |   |
| NA21596 | MKK |   |
| NA21611 | MKK |   |
| NA21616 | MKK |   |
| NA21631 | MKK |   |
| NA21632 | MKK |   |
| NA21649 | MKK |   |
| NA21685 | MKK |   |
| NA21689 | MKK |   |
| NA21719 | MKK |   |
| NA21722 | MKK |   |
| NA21738 | MKK |   |
| NA21742 | MKK |   |
| NA21743 | MKK |   |
| NA21744 | MKK |   |
| NA21774 | MKK |   |
| NA21776 | MKK |   |
| NA21784 | MKK |   |
| NA20505 | TSI | * |
| NA20506 | TSI | * |
| NA20508 | TSI | * |
| NA20509 | TSI | * |

|         |     |   |
|---------|-----|---|
| NA20515 | TSI | * |
| NA20517 | TSI | * |
| NA20518 | TSI | * |
| NA20519 | TSI | * |
| NA20520 | TSI | * |
| NA20522 | TSI | * |
| NA20524 | TSI | * |
| NA20527 | TSI | * |
| NA20529 | TSI | * |
| NA20531 | TSI | * |
| NA20535 | TSI | * |
| NA20538 | TSI | * |
| NA20541 | TSI | * |
| NA20543 | TSI | * |
| NA20581 | TSI | * |
| NA20582 | TSI | * |
| NA20752 | TSI | * |
| NA20753 | TSI | * |
| NA20754 | TSI | * |
| NA20755 | TSI | * |
| NA20758 | TSI | * |
| NA20759 | TSI | * |
| NA20761 | TSI | * |
| NA20765 | TSI | * |

|         |     |   |
|---------|-----|---|
| NA20768 | TSI | * |
| NA20769 | TSI | * |
| NA20770 | TSI | * |
| NA20771 | TSI | * |
| NA20773 | TSI | * |
| NA20783 | TSI | * |
| NA20786 | TSI | * |
| NA20787 | TSI | * |
| NA20795 | TSI | * |
| NA20799 | TSI | * |
| NA20803 | TSI | * |
| NA20804 | TSI | * |
| NA20805 | TSI | * |
| NA20807 | TSI | * |
| NA20808 | TSI | * |
| NA20809 | TSI | * |
| NA20811 | TSI | * |
| NA20813 | TSI | * |
| NA20815 | TSI | * |
| NA20819 | TSI | * |
| NA18486 | YRI | * |
| NA18487 | YRI | * |
| NA18498 | YRI | * |
| NA18499 | YRI | * |

|         |     |   |
|---------|-----|---|
| NA18510 | YRI | * |
| NA18511 | YRI | * |
| NA18520 | YRI | * |
| NA18867 | YRI | * |
| NA18868 | YRI | * |
| NA18873 | YRI | * |
| NA18907 | YRI | * |
| NA18909 | YRI | * |
| NA18910 | YRI | * |
| NA18916 | YRI | * |
| NA18917 | YRI | * |
| NA18923 | YRI | * |
| NA18924 | YRI | * |
| NA18934 | YRI | * |
| NA19095 | YRI | * |
| NA19107 | YRI | * |
| NA19108 | YRI | * |
| NA19113 | YRI | * |
| NA19114 | YRI | * |
| NA19117 | YRI | * |
| NA19118 | YRI | * |
| NA19121 | YRI | * |
| NA19122 | YRI |   |
| NA19146 | YRI | * |

|         |     |   |
|---------|-----|---|
| NA19147 | YRI | * |
| NA19149 | YRI | * |
| NA19175 | YRI | * |
| NA19181 | YRI |   |
| NA19182 | YRI |   |
| NA19184 | YRI |   |
| NA19185 | YRI | * |
| NA19189 | YRI | * |
| NA19190 | YRI | * |
| NA19197 | YRI | * |
| NA19198 | YRI | * |
| NA19213 | YRI | * |
| NA19225 | YRI | * |
| NA19226 | YRI |   |
| NA19235 | YRI | * |
| NA19236 | YRI | * |
| NA19247 | YRI | * |
| NA19248 | YRI | * |
| NA19256 | YRI | * |
| NA19257 | YRI | * |

**Table S4.** Samples used in this study and their respective populations



| <b>hg19</b>  | <b>CH17</b>               | <b>Variant</b>  | <b>Novel Allele notes 1</b> | <b>Novel Allele notes 2</b> |
|--------------|---------------------------|-----------------|-----------------------------|-----------------------------|
| V7-81*01 orf | region not covered        |                 |                             |                             |
| V3-74*01     | V3-74*01                  |                 |                             |                             |
| V3-73*02     | V3-73*02                  |                 |                             |                             |
| V3-72*01     | V3-72*01                  |                 |                             |                             |
| V2-70*13     | V2-70*01                  | allelic/SYN     |                             |                             |
| not present  | V1-69D*01                 | insertion       |                             |                             |
| not present  | V1-f*01                   | insertion       |                             |                             |
| not present  | V3-h*01 ( <i>pseudo</i> ) | insertion       |                             |                             |
| not present  | V2-70D*04                 | insertion       |                             |                             |
| V1-69*06     | V1-69*06                  |                 |                             |                             |
| V3-66*03     | V3-66*03                  |                 |                             |                             |
| V3-64*02     | V3-64*02                  |                 |                             |                             |
| V4-61*08     | V4-61*01                  | allelic/NON-SYN |                             |                             |
| V4-59*01     | V4-59*01                  |                 |                             |                             |
| V1-58*02     | V1-58*01                  | allelic/NON-SYN |                             |                             |
| V3-53*01     | V3-53*02                  | allelic/NON-SYN |                             |                             |
| V5-51*01     | V5-51*01                  |                 |                             |                             |
| V3-49*03     | V3-49*04                  | allelic/NON-SYN |                             |                             |
| V3-48*02     | V3-48*03                  | allelic/NON-SYN |                             |                             |
| V1-46*01     | V1-46*01                  |                 |                             |                             |
| V1-45*02     | V1-45*02                  |                 |                             |                             |
| V3-43*01     | V3-43*01                  |                 |                             |                             |
| V4-39*01     | V4-39*01                  |                 |                             |                             |
| V3-38*02 orf | V3-38*02 orf              |                 |                             |                             |
| V3-35*01 orf | V3-35*01 orf              |                 |                             |                             |

|              |              |                 |                                |                                       |
|--------------|--------------|-----------------|--------------------------------|---------------------------------------|
| V4-34*01     | V4-34*01     |                 |                                |                                       |
| V3-33*01     | V3-33*01     |                 |                                |                                       |
| V4-31*02     | V4-30-2*01   | complex event   |                                |                                       |
| V3-30*03     | V3-30*18     | allelic/NON-SYN |                                |                                       |
| V4-28*03     | V4-28*07     | allelic/SYN     | Similar to *01 (295 nt/296 nt) | Variant in 1KG; rs56407212 (C/T)      |
| V2-26*01     | V2-26*01     |                 |                                |                                       |
| V1-24*01     | V1-24*01     |                 |                                |                                       |
| V3-23*01     | V3-23*04     | allelic/NON-SYN |                                |                                       |
| V3-21*01     | V3-21*01     |                 |                                |                                       |
| V3-20*01     | V3-20*02     | allelic/NON-SYN | Similar to *01 (293 nt/294 nt) | Variant in 1KG; rs112170273 (NON-SYN) |
| V1-18*01     | V1-18*04     | allelic/SYN     | Similar to *01 (293 nt/294 nt) | Variant in 1KG; rs72695948 (SYN)      |
| V3-16*02 orf | V3-16*02 orf |                 |                                |                                       |
| V3-15*01     | V3-15*01     |                 |                                |                                       |
| V3-13*01     | V3-13*05     | allelic/NON-SYN |                                |                                       |
| V3-11*01     | V3-11*06     | allelic/NON-SYN |                                |                                       |
| V3-9*01      | V5-a*03      | complex event   |                                |                                       |
| V1-8*01      | V3-64D*06    | complex event   |                                |                                       |
| V3-7*01      | V3-7*03      | allelic/SYN     |                                |                                       |
| V2-5*01      | V2-5*10      | allelic/NON-SYN |                                |                                       |
| not present  | V7-4-1*01    | insertion       |                                |                                       |
| V4-4*07      | V4-4*02      | allelic/NON-SYN |                                |                                       |
| V1-3*02      | V1-3*01      | allelic/NON-SYN |                                |                                       |
| V1-2*02      | V1-2*04      | allelic/NON-SYN |                                |                                       |
| V6-1*01      | V6-1*01      |                 |                                |                                       |
| D1-1*01      | D1-1*01      |                 |                                |                                       |
| D2-2*02      | D2-2*02      |                 |                                |                                       |

|              |              |  |  |  |
|--------------|--------------|--|--|--|
| D3-3*01      | D3-3*01      |  |  |  |
| D4-4*01      | D4-4*01      |  |  |  |
| D5-5*01      | D5-5*01      |  |  |  |
| D6-6*01      | D6-6*01      |  |  |  |
| D1-7*01      | D1-7*01      |  |  |  |
| D2-8*01      | D2-8*01      |  |  |  |
| D3-9*01      | D3-9*01      |  |  |  |
| D3-10*01     | D3-10*01     |  |  |  |
| D4-11*01 orf | D4-11*01 orf |  |  |  |
| D5-12*01     | D5-12*01     |  |  |  |
| D6-13*01     | D6-13*01     |  |  |  |
| D1-14*01 orf | D1-14*01 orf |  |  |  |
| D2-15*01     | D2-15*01     |  |  |  |
| D3-16*01     | D3-16*01     |  |  |  |
| D4-17*01     | D4-17*01     |  |  |  |
| D5-18*01     | D5-18*01     |  |  |  |
| D6-19*01     | D6-19*01     |  |  |  |
| D1-20*01     | D1-20*01     |  |  |  |
| D2-21*02     | D2-21*02     |  |  |  |
| D3-22*01     | D3-22*01     |  |  |  |
| D4-23*01 orf | D4-23*01 orf |  |  |  |
| D5-24*01 orf | D5-24*01 orf |  |  |  |
| D6-25*01     | D6-25*01     |  |  |  |
| D1-26*01     | D1-26*01     |  |  |  |
| D7-27*01     | D7-27*01     |  |  |  |
| J1*01        | J1*01        |  |  |  |

|              |              |  |  |  |
|--------------|--------------|--|--|--|
| <i>J2*01</i> | <i>J2*01</i> |  |  |  |
| <i>J3*02</i> | <i>J3*02</i> |  |  |  |
| <i>J4*02</i> | <i>J4*02</i> |  |  |  |
| <i>J5*02</i> | <i>J5*02</i> |  |  |  |
| <i>J6*03</i> | <i>J6*03</i> |  |  |  |

**Table S5.** Genes, variants and alleles of CH17 compared to GRCh37

Alleles in red represent differences between GRCh37 and CH17 haplotypes; those alleles highlighted in yellow were not previously described.

| HAPLO | V<br>GENE*allele | Heptamer<br>(only<br>fam1) | bp | Octamer  | bp | TATA    | bp      | AT<br>G | splice    | 7mer    | bp | 9mer      | notes             |
|-------|------------------|----------------------------|----|----------|----|---------|---------|---------|-----------|---------|----|-----------|-------------------|
| NCBI  | V3-74*01         |                            |    | ATGCAAAT | 18 | AAGAAAA | 90      | yes     | AGGT/AGGT | CACAGTG | 23 | ACACAAACC |                   |
| CH17  | V3-74*01         |                            |    | ATGCAAAT | 18 | AAGAAAA | 90      | yes     | AGGT/AGGT | CACAGTG | 23 | ACACAAACC |                   |
| NCBI  | V3-73*02         |                            |    | ATGCAAAT | 19 | ATGAAAA | 10<br>1 | yes     | AGGT/AGGT | CACAGTG | 23 | ACACAAACC |                   |
| CH17  | V3-73*02         |                            |    | ATGCAAAT | 19 | ATGAAAA | 10<br>1 | yes     | AGGT/AGGT | CACAGTG | 23 | ACACAAACC |                   |
| NCBI  | V3-72*01         |                            |    | ATGCAAAT | 18 | ATGAAAA | 10<br>1 | yes     | AGGT/AGGT | CACAGCG | 23 | ACACAAACC |                   |
| CH17  | V3-72*01         |                            |    | ATGCAAAT | 18 | ATGAAAA | 10<br>1 | yes     | AGGT/AGGT | CACAGCG | 23 | ACACAAACC |                   |
| NCBI  | V2-70*13         |                            |    | ATGCAAAT | 26 | TTCAAAA | 41      | yes     | CTGT/AGGG | CACAGAG | 23 | ACAAGAACC |                   |
| CH17  | V2-70*01         |                            |    | ATGCAAAT | 26 | TTCAAAA | 41      | yes     | CTGT/AGGG | CACAGAG | 23 | ACAAGAACC |                   |
| CH17  | V1-69D*01        | CTCATGC                    | 2  | ATGCAAAT | 19 | TAAATAT | 81      | yes     | AGGT/AGGT | CACAGTG | 23 | TCAGAAACC |                   |
| CH17  | V1-f*01          | CTCATGA                    | 2  | ATGCAAAT | 19 | TAAATAC | 80      | yes     | AGGT/AGGC | CACAGTG | 23 | TCAGAAACC | first description |
| CH17  | V2-70D*04        |                            |    | ATGCAAAT | 26 | TTCAAAA | 41      | yes     | CTGT/AGGG | CACAGAG | 23 | ACAAGAACC |                   |
| NCBI  | V1-69*06         | CTCATGC                    | 2  | ATGCAAAT | 19 | TAAATAT | 81      | yes     | AGGT/AGGT | CACAGTG | 23 | TCAGAAACC |                   |
| CH17  | V1-69*06         | CTCATGC                    | 2  | ATGCAAAT | 26 | TAAATAT | 81      | yes     | AGGT/AGGT | CACAGTG | 23 | TCAGAAACC |                   |
| NCBI  | V3-66*03         |                            |    | ATGCAAAT | 18 | ATGAAAA | 10<br>0 | yes     | AGGT/AGGT | CACAGTG | 23 | ACACAAACC |                   |
| CH17  | V3-66*03         |                            |    | ATGCAAAT | 18 | ATGAAAA | 10<br>0 | yes     | AGGT/AGGT | CACAGTG | 23 | ACACAAACC |                   |
| NCBI  | V3-64*02         |                            |    | ATGCAAAT | 18 | ATGAAAA | 10<br>1 | yes     | AGGT/AGGT | CACAGTG | 23 | GCAGAAACC |                   |
| CH17  | V3-64*02         |                            |    | ATGCAAAT | 18 | ATGAAAA | 10<br>1 | yes     | AGGT/AGGT | CACAGTG | 23 | GCAGAAACC |                   |
| NCBI  | V4-61*08         |                            |    | ATGCAAAT | 39 | TTAAATT | 59      | yes     | ATGT/AGGG | CACAGTG | 23 | ACACAAACC |                   |
| CH17  | V4-61*01         |                            |    | ATGCAAAT | 39 | TTAAATT | 59      | yes     | ATGT/AGGG | CACAGTG | 23 | ACACAAACC |                   |
| NCBI  | V4-59*01         |                            |    | ATGCAAAT | 39 | TTAAATT | 59      | yes     | ATGT/AGGG | CACAGTG | 23 | ACAAAAACC |                   |
| CH17  | V4-59*01         |                            |    | ATGCAAAT | 39 | TTAAATT | 59      | yes     | ATGT/AGGG | CACAGTG | 23 | ACAAAAACC |                   |
| NCBI  | V1-58*02         | CTCATGA                    | 2  | ATGCAAAT | 19 | TAAATAT | 81      | yes     | AGGC/AGGT | CACAGTG | 23 | TCAGAAACG |                   |
| CH17  | V1-58*01         | CTCATGA                    | 2  | ATGCAAAT | 19 | TAAATAT | 81      | yes     | AGGC/AGGT | CACAGTG | 23 | TCAGAAACG |                   |
| NCBI  | V3-53*01         |                            |    | ATCCAAAT | 18 | ATGAAAA | 98      | yes     | AGGT/AGGT | CACAGTG | 23 | ACACAAACC |                   |

|      |              |         |   |          |    |         |     |     |           |         |    |           |
|------|--------------|---------|---|----------|----|---------|-----|-----|-----------|---------|----|-----------|
| CH17 | V3-53*02     |         |   | ATGCAAAT | 18 | ATGAAAA | 98  | yes | AGGT/AGGT | CACAGTG | 23 | ACACAAACC |
| NCBI | V5-51*01     |         |   | ATGCAAAT | 18 | ACTTAAA | 79  | yes | AGGT/AGGA | CACAGTG | 23 | CTAAAACCC |
| CH17 | V5-51*01     |         |   | ATGCAAAT | 18 | ACTTAAA | 79  | yes | AGGT/AGGA | CACAGTG | 23 | CTAAAACCC |
| NCBI | V3-49*03     |         |   | ATGCAAAT | 18 | ATGAAAA | 101 | yes | AGGT/AGGT | CACAGTG | 23 | ACACAAACC |
| CH17 | V3-49*04     |         |   | ATGCAAAT | 18 | ATGAAAA | 101 | yes | AGGT/AGGT | CACAGTG | 23 | ACACAAACC |
| NCBI | V3-48*02     |         |   | ATGCAAAT | 18 | ATGAAAA | 100 | yes | AGGT/AGGT | CACAGTG | 23 | ACACAAACC |
| CH17 | V3-48*03     |         |   | ATGCAAAT | 18 | ATGAAAA | 100 | yes | AGGT/AGGT | CACAGTG | 23 | ACACAAACC |
| NCBI | V1-46*01     | CTCATGA | 2 | ATGCAAAT | 19 | TAAATAT | 81  | yes | AGGT/AGGT | CACAGTG | 23 | TCAGAAACC |
| CH17 | V1-46*01     | CTCATGA | 2 | ATGCAAAT | 19 | TAAATAT | 81  | yes | AGGT/AGGT | CACAGTG | 23 | TCAGAAACC |
| NCBI | V1-45*02     | CTCATCA | 2 | ATGCAAAT | 19 | TAAATAT | 81  | yes | AGGT/AGAT | CACAGTG | 23 | TCAGAAACC |
| CH17 | V1-45*02     | CTCATCA | 2 | ATGCAAAT | 19 | TAAATAT | 81  | yes | AGGT/AGAT | CACAGTG | 23 | TCAGAAACC |
| NCBI | V3-43*01     |         |   | ATGCAAAT | 18 | ATGAAAA | 101 | yes | AGGT/AGGT | CACAGTG | 23 | ACAAAAACC |
| CH17 | V3-43*01     |         |   | ATGCAAAT | 18 | ATGAAAA | 101 | yes | AGGT/AGGT | CACAGTG | 23 | ACAAAAACC |
| NCBI | V4-39*01     |         |   | ATGCAAAT | 39 | TTAAATT | 58  | yes | ATGT/AGGG | CACAGTG | 23 | ACAAAAACC |
| CH17 | V4-39*01     |         |   | ATGCAAAT | 39 | TTAAATT | 58  | yes | ATGT/AGGG | CACAGTG | 23 | ACAAAAACC |
| NCBI | V3-38*02 orf |         |   | —        | —  | —       | —   | yes | AGGT/AGGT | TACACAG | 23 | ACACAAACC |
| CH17 | V3-38*02 orf |         |   | —        | —  | —       | —   | yes | AGGT/AGGT | TACACAG | 23 | ACACAAACC |
| NCBI | V3-35*01 orf |         |   | ATGCAAAT | 18 | ATAAAAA | 95  | yes | AGGT/AGGT | CACTGAG | 23 | ACACAAACC |
| CH17 | V3-35*01 orf |         |   | ATGCAAAT | 18 | ATAAAAA | 95  | yes | AGGT/AGGT | CACTGTG | 23 | ACACAAACC |
| NCBI | V4-34*01     |         |   | ATGCAAAT | 39 | TTAAATT | 59  | yes | ATGT/AGGG | CACAGTG | 23 | ACAAAAACC |
| CH17 | V4-34*01     |         |   | ATGCAAAT | 39 | TTAAATT | 59  | yes | ATGT/AGGG | CACAGTG | 23 | ACAAAAACC |
| NCBI | V3-33*01     |         |   | ATGCAAAT | 18 | ATGAAAA | 100 | yes | AGGT/AGGT | CACAGTG | 23 | ACACAAACC |
| CH17 | V3-33*01     |         |   | ATGCAAAT | 18 | ATGAAAA | 100 | yes | AGGT/AGGT | CACAGTG | 23 | ACACAAACC |
| CH17 | V4-30-2*01   |         |   | ATGCAAAT | 38 | TTAAATT | 59  | yes | ATGT/AGGG | CACAATG | 23 | ACACAAACC |
| NCBI | V3-30*03     |         |   | ATGCAAAT | 18 | ATGAAAA | 100 | yes | AGGT/AGGT | CACAGTG | 23 | ACACAAACC |

first description

|      |                   |         |   |              |    |         |         |     |           |         |    |           |                   |
|------|-------------------|---------|---|--------------|----|---------|---------|-----|-----------|---------|----|-----------|-------------------|
| CH17 | V3-30*18          |         |   | ATGCAAAT     | 18 | ATGAAAA | 10<br>0 | yes | AGGT/AGGT | CACAGTG | 23 | ACACAAACC |                   |
| NCBI | V4-28*03          |         |   | ATGCAAAT     | 38 | TTAAATT | 59      | yes | ATGT/AGTG | CACAGTG | 23 | ACACAAACC |                   |
| CH17 | V4-28*07 novel    |         |   | ATGCAAAT     | 38 | TTAAATT | 59      | yes | ATGT/AGGG | CACAGTG | 23 | ACACAAACC |                   |
| NCBI | V2-26*01          |         |   | ATGCAAAT     | 26 | TTCAAAA | 41      | yes | CTGT/AGGG | CACAGAG | 23 | ACAAGAACC |                   |
| CH17 | V2-26*01          |         |   | ATGCAAAT     | 26 | TTCAAAA | 41      | yes | CTGT/AGGG | CACAGAG | 23 | ACAAGAACC |                   |
| NCBI | V1-24*01          | CTCATGA | 2 | ATGCAAAT     | 19 | TAAATAC | 80      | yes | AGGC/AGGC | CACAGTG | 23 | TCAGAAACC |                   |
| CH17 | V1-24*01          | CTCATGA | 2 | ATGCAAAT     | 19 | TAAATAC | 80      | yes | AGGC/AGGC | CACAGTG | 23 | TCAGAAACC |                   |
| NCBI | V3-23*01          |         |   | ATGCAAAT     | 18 | ATGAAAA | 10<br>0 | yes | AGGT/AGGT | CACAGTG | 23 | ACACAAACC |                   |
| CH17 | V3-23*04          |         |   | ATGCAAAT     | 18 | ATGAAAA | 10<br>0 | yes | AGGT/AGGT | CACAGTG | 23 | ACACAAACC |                   |
| NCBI | V3-21*01          |         |   | ATGCAAAT     | 18 | ATGAAAA | 10<br>0 | yes | AGGT/AGGT | CACAGTG | 23 | ACACAAACC |                   |
| CH17 | V3-21*01          |         |   | ATGCAAAT     | 18 | ATGAAAA | 10<br>0 | yes | AGGT/AGGT | CACAGTG | 23 | ACACAAACC |                   |
| NCBI | V3-20*01          |         |   | ATGCAGG<br>T | 17 | ATGAAAA | 10<br>0 | yes | AGGT/AGGT | CACAGTG | 23 | ACACAAACG |                   |
| CH17 | V3-20*02 novel    |         |   | ATGCAGG<br>T | 17 | ATGAAAA | 10<br>1 | yes | AGGT/AGGT | CACAGTG | 23 | ACACAAACG |                   |
| NCBI | V1-18*01          | TTCATGA | 2 | ATGCAAAT     | 12 | TATAGAT | 76      | yes | AGGT/AGGT | CACAGTG | 23 | TCAGAAACC |                   |
| CH17 | V1-18*04<br>novel | TTCATGA | 2 | ATGCAAAT     | 12 | TATAGAT | 76      | yes | AGGT/AGGT | CACAGTG | 23 | TCAGAAACC |                   |
| NCBI | V3-16*02 orf      |         |   | ATGCAAAT     | 18 | ATGAAAA | 94      | yes | AGGT/AGGT | TCCTGTG | 23 | ACACAAACC |                   |
| CH17 | V3-16*02 orf      |         |   | ATGCAAAT     | 18 | ATGAAAA | 95      | yes | AGGT/AGGT | TCCTGTG | 23 | ACACAAACC |                   |
| NCBI | V3-15*01          |         |   | ATGCAAAT     | 18 | ATGAAAA | 10<br>1 | yes | AGGT/AGGT | CACAGTG | 23 | ACACAAACC |                   |
| CH17 | V3-15*01          |         |   | ATGCAAAT     | 18 | ATGAAAA | 10<br>1 | yes | AGGT/AGGT | CACAGTG | 23 | ACACAAACC |                   |
| NCBI | V3-13*01          |         |   | ATGCAAAT     | 18 | ATGAAAA | 10<br>1 | yes | AGGT/AGGT | CACAGTG | 23 | ACACAAACC |                   |
| CH17 | V3-13*05 novel    |         |   | ATGCAAAT     | 18 | ATGAAAA | 10<br>1 | yes | AGGT/AGGT | CACAGTG | 23 | ACACAAACC |                   |
| NCBI | V3-11*01          |         |   | ATGCAAAT     | 18 | ATAAAAA | 10<br>1 | yes | AGGT/AGGT | CACAGTG | 23 | ACACAAACC |                   |
| CH17 | V3-11*06<br>novel |         |   | ATGCAAAT     | 18 | ATAAAAA | 10<br>1 | yes | AGGT/AGGT | CACAGTG | 23 | ACACAAACC |                   |
| CH17 | V5-a*03           |         |   | ATGCAAAT     | 18 | ACTTAAA | 79      | yes | AGGT/AGGA | CACAGTG | 23 | CTAAAACCC | first description |

|                |                 |         |   |          |    |         |         |     |           |         |    |           |                                                          |
|----------------|-----------------|---------|---|----------|----|---------|---------|-----|-----------|---------|----|-----------|----------------------------------------------------------|
| CH17           | V3-64D*06 novel |         |   | ATGCAAAT | 18 | ATGAAAA | 10<br>1 | yes | AGGT/AGAT | CACAGTG | 23 | ACACAAACC | first description                                        |
| NCBI           | V3-7*01         |         |   | ATGCAAAT | 18 | ATGAAAA | 10<br>0 | yes | AGGT/AGGT | CACAGTG | 23 | ACACAAACC |                                                          |
| CH17           | V3-7*03         |         |   | ATGCAAAT | 18 | ATGAAAA | 10<br>0 | yes | AGGT/AGGT | CACAGTG | 23 | ACACAAACC |                                                          |
| NCBI           | V2-5*01         |         |   | ATGCAAAT | 26 | TTGAAAA | 42      | yes | ATGT/AGGG | CACAAAG | 23 | ACAAAAACC |                                                          |
| CH17           | V2-5*10         |         |   | ATGCAAAT | 26 | TTGAAAA | 42      | yes | ATGT/AGGG | CACAAAG | 23 | ACAAAAACC |                                                          |
| CH17           | V7-4-1*01       | CTCATGA | 2 | ATGCAAAT | 8  | TAAATAT | 80      | yes | AGGT/AGGT | CACAGTG | 23 | TCAAAAACC | first description                                        |
| NCBI           | V4-4*07         |         |   | ATGCAAAT | 39 | TTAAATT | 59      | yes | ATGT/AGGG | CACAGTG | 23 | ACACAAACC |                                                          |
| CH17           | V4-4*02         |         |   | ATGCAAAT | 39 | TTAAATT | 59      | yes | ATGT/AGGG | CACAGTG | 23 | ACACAAACC |                                                          |
| NCBI           | V1-3*02         | CTCATGA | 2 | ATGCAAAT | 8  | TGACTAT | 77      | yes | AGGT/AGGT | CACAGTG | 23 | TCAGAAACC |                                                          |
| CH17           | V1-3*01         | CTCATGA | 2 | ATGCAAAT | 8  | TGACTAT | 77      | yes | AGGT/AGGT | CACAGTG | 23 | TCAGAAACC |                                                          |
| NCBI           | V1-2*02         | CTCATGA | 2 | ATGCAAAT | 19 | TAAATAC | 82      | yes | AGGT/AGGA | CACAGTG | 23 | TCAGAAACC |                                                          |
| CH17           | V1-2*04         | CTCATGA | 2 | ATGCAAAT | 19 | TAAATAC | 82      | yes | AGGT/AGGA | CACAGTG | 23 | TCAGAAACC |                                                          |
| NCBI           | V6-1*01         |         |   |          |    |         |         |     |           |         |    |           |                                                          |
| CH17           | V6-1*01         |         |   |          |    |         |         |     |           |         |    |           |                                                          |
| G248           | V1-c            | CCCATGA | 2 | ATGCAAAT | 19 | TAAATAT | 81      | yes | AGGA/AGGT | CACAGTG | 23 | TCAGAAAGC | first description                                        |
| G248,<br>ABC10 | V3-d            |         |   | ATGCAAAT | 18 | ATGAAAA | 10<br>1 | yes | AGAT/AGGT | CACAGTG | 23 | ACACAAACC | first description                                        |
| ABC10          | V4-b            |         |   | ATGCAAAT | 39 | TTAAATT | 58      | yes | ATGT/AGGG | CACAGTG | 23 | ACACAAACC | first<br>description...structure<br>and seqs match V4-39 |
| ABC11          | V3-30-3         |         |   | ATGCAAAT | 18 | ATGAAAA | 10<br>0 | yes | AGGT/AGGT | CACAGTG | 23 | ACACAAACC | first<br>description...structure<br>and seqs match V3-30 |
| ABC11          | V4-30-2         |         |   | ATGCAAAT | 38 | TTAAATT | 59      | yes | ATGT/AGGG | CACAATG | 23 | ACACAAACC | first description...same as<br>CH17                      |
| ABC11          | V4-30-4         |         |   | ATGCAAAT | 38 | TTAAATT | 59      | yes | ATGT/AGGG | CACAATG | 23 | ACACAAACC | first description                                        |

**Table S6.** RSS motifs identified in CH17 and fosmid haplotypes



| Fosmid (Accession) | Overlap CNV? | Gene              | Allele     | Most similar allele      | Variant (NS/SYN) | In 1KG/dbsnp 135?                        | SNP/s            | Notes                                                                                                                                                                                                                                                                   |
|--------------------|--------------|-------------------|------------|--------------------------|------------------|------------------------------------------|------------------|-------------------------------------------------------------------------------------------------------------------------------------------------------------------------------------------------------------------------------------------------------------------------|
| ABC8-718240A7      | yes          | <i>IGHV3-30-3</i> | *03, novel | V3-30-3*01; 293/294 nts  |                  |                                          |                  | Complex event; This gene resides at locus <i>IGHV3-30-3</i> ; however, we found allele V3-30*04 here, although this was different by only one bp.                                                                                                                       |
| ABC8-718240A7      | yes          | <i>IGHV4-30-4</i> | *07, novel | V4-30-2*05, *01; 288/297 | 3 NS; 5 SYN      | gene not in reference                    |                  | Complex event: This gene resides at locus <i>IGHV4-30-4</i> ; however, allele found here may be hybrid between alleles from multiple loci.                                                                                                                              |
| ABC8-5713749P16    |              | <i>IGHV4-59</i>   | *01        |                          |                  |                                          |                  |                                                                                                                                                                                                                                                                         |
| ABC8-5713749P16    |              | <i>IGHV4-61</i>   | *02        |                          |                  |                                          |                  |                                                                                                                                                                                                                                                                         |
| ABC9-41239600E19   |              | <i>IGHV3-43</i>   | *01        |                          |                  |                                          |                  |                                                                                                                                                                                                                                                                         |
| ABC9-43993300H10   | yes          | <i>IGHV3-21</i>   | *01        |                          |                  |                                          |                  |                                                                                                                                                                                                                                                                         |
| ABC9-43993300H10   | yes          | <i>IGHV3-23</i>   | *01        |                          |                  |                                          |                  | Duplication                                                                                                                                                                                                                                                             |
| ABC9-43849600N9    | yes          | <i>IGHV3-23</i>   | *01        |                          |                  |                                          |                  | Duplication                                                                                                                                                                                                                                                             |
| ABC9-43849600N9    | yes          | <i>IGHV1-24</i>   | *01        |                          |                  |                                          |                  |                                                                                                                                                                                                                                                                         |
| ABC9-43849600N9    | yes          | <i>IGHV2-26</i>   | *01        |                          |                  |                                          |                  |                                                                                                                                                                                                                                                                         |
| ABC10-44509600J4   | yes          | <i>IGHV4-4</i>    | *08, novel | V4-59*08; 288/291 nt     | 1 SYN            | yes; at <i>IGHV4-59</i> locus, see notes | 1KG_14_107083337 | This gene resides at <i>IGHV4-4</i> locus, but shares sequence with V4-4 and V4-59 alleles. 1KG_14_107083337 shared with V4-59*05. The other two SNPs differentiating this allele from <i>IGHV4-59*08</i> are also found in <i>IGHV4-59</i> and <i>IGHV4-4</i> alleles. |
| ABC10-44509600J4   | yes          | <i>IGHV7-4-1</i>  | *02        |                          |                  |                                          |                  | Insertion                                                                                                                                                                                                                                                               |
| ABC10-44509600J4   | yes          | <i>IGHV2-5</i>    | *10        |                          |                  |                                          |                  |                                                                                                                                                                                                                                                                         |
| ABC10-44687300P14  | yes, partial | <i>IGHV4-30-2</i> | *01        |                          |                  |                                          |                  | Complex event                                                                                                                                                                                                                                                           |
| ABC10-44687300P14  | yes, partial | <i>IGHV3-30-3</i> | *01        |                          |                  |                                          |                  | Complex event                                                                                                                                                                                                                                                           |
| ABC10-44687300P14  | yes, partial | <i>IGHV4-30-4</i> | *07, novel | *01; 297/299 nt          | 1 NS; 1 SYN      | gene not in reference                    |                  | Complex event                                                                                                                                                                                                                                                           |

|                   |              |                   |            |                 |             |                       |                                                                             |  |                                                                                                                                                    |
|-------------------|--------------|-------------------|------------|-----------------|-------------|-----------------------|-----------------------------------------------------------------------------|--|----------------------------------------------------------------------------------------------------------------------------------------------------|
| ABC10-44687300P14 | yes, partial | <i>IGHV3-30-5</i> | *02        |                 |             |                       |                                                                             |  | Complex event; Alleles of <i>IGHV3-30-5</i> and <i>IGHV3-30</i> are indistinguishable, but this gene occupies position of <i>IGHV3-30-5</i> locus. |
| ABC10-1585770E3   | yes, partial | <i>IGHV1-69</i>   | *14, novel |                 |             |                       |                                                                             |  | Insertion                                                                                                                                          |
| ABC10-1585770E3   | yes, partial | <i>IGHV2-70D</i>  | *14, novel |                 | 1 SYN       | yes                   | rs112642180 (A/C)                                                           |  | Insertion                                                                                                                                          |
| ABC10-1585770E3   | yes, partial | <i>IGHV3-h</i>    | *02        |                 |             |                       |                                                                             |  | Insertion                                                                                                                                          |
| ABC10-1585770E3   | yes, partial | <i>IGHV1-f</i>    | *01        |                 |             |                       |                                                                             |  | Insertion                                                                                                                                          |
| ABC10-44748900N6  | yes          | <i>IGHV3-9</i>    | *03, novel | *01; 297/298 nt | 1 NS        | yes                   | rs8020204 (A/G)                                                             |  |                                                                                                                                                    |
| ABC10-44084700I10 | yes          | <i>IGHV3-38</i>   | *03, novel | *02; 287/288 nt | 1 SYN       | yes                   | rs58308167 (C/A)                                                            |  |                                                                                                                                                    |
| ABC10-44084700I10 | yes          | <i>IGHV4-b</i>    | *02        |                 |             |                       |                                                                             |  | Insertion                                                                                                                                          |
| ABC10-44145400L1  | yes          | <i>IGHV4-b</i>    | *02        |                 |             |                       |                                                                             |  | Insertion                                                                                                                                          |
| ABC10-44145400L1  | yes          | <i>IGHV3-43D</i>  | *03, novel | *01; 294/298 nt | 2 NS; 2 SYN | yes                   | rs2467912 (T/C);<br>rs2467911 (G/A);<br>rs4977158 (T/G);<br>rs2467910 (T/C) |  | Insertion                                                                                                                                          |
| ABC10-44145400L1  | yes          | <i>IGHV3-d</i>    | *01        |                 |             |                       |                                                                             |  | Insertion                                                                                                                                          |
| ABC11-47355000A14 | yes          | <i>IGHV4-28</i>   | *01        |                 |             |                       |                                                                             |  |                                                                                                                                                    |
| ABC11-47355000A14 | yes          | <i>IGHV3-30</i>   | *18        |                 |             |                       |                                                                             |  | Complex event                                                                                                                                      |
| ABC11-47355000A14 | yes          | <i>IGHV4-30-2</i> | *06, novel | *01; 298/299    | 1 NS        | gene not in reference |                                                                             |  | Complex event                                                                                                                                      |
| ABC11-47150400I4  | yes          | <i>IGHV3-30</i>   | *18        |                 |             |                       |                                                                             |  | Complex event                                                                                                                                      |
| ABC11-47150400I4  | yes          | <i>IGHV4-30-2</i> | *06, novel | *01; 298/299    | 1 NS        | gene not in reference |                                                                             |  | Complex event                                                                                                                                      |
| ABC11-47150400I4  | yes          | <i>IGHV3-30-3</i> | *01        |                 |             |                       |                                                                             |  | Complex event                                                                                                                                      |
| ABC11-47354200D2  | yes          | <i>IGHV3-30-3</i> | *01        |                 |             |                       |                                                                             |  | Complex event                                                                                                                                      |
| ABC11-47354200D2  | yes          | <i>IGHV4-30-4</i> | *01        |                 |             |                       |                                                                             |  | Complex event                                                                                                                                      |

|                   |     |                              |     |  |  |  |  |                                                                                                                                                    |
|-------------------|-----|------------------------------|-----|--|--|--|--|----------------------------------------------------------------------------------------------------------------------------------------------------|
| ABC11-47354200D2  | yes | <i>IGHV3-30-5</i>            | *18 |  |  |  |  | Complex event; Alleles of <i>IGHV3-30-5</i> and <i>IGHV3-30</i> are indistinguishable, but this gene occupies position of <i>IGHV3-30-5</i> locus. |
| ABC11-49598600E10 | yes | <i>IGHV3-30-5</i>            | *18 |  |  |  |  | Complex event; Alleles of <i>IGHV3-30-5</i> and <i>IGHV3-30</i> are indistinguishable, but this gene occupies position of <i>IGHV3-30-5</i> locus. |
| ABC11-49598600E10 | yes | <i>IGHV4-31</i>              | *03 |  |  |  |  |                                                                                                                                                    |
| ABC11-49598600E10 | yes | <i>IGHV3-33</i>              | *01 |  |  |  |  |                                                                                                                                                    |
| ABC11-48019600E23 | yes | <i>IGHV2-26</i>              | *01 |  |  |  |  |                                                                                                                                                    |
| ABC11-48019600E23 | yes | <i>IGHV4-28</i>              | *01 |  |  |  |  |                                                                                                                                                    |
| ABC11-48019600E23 | yes | <i>IGHV3-33</i>              | *01 |  |  |  |  |                                                                                                                                                    |
| ABC11-48009100A5  |     | <i>IGHV3-48</i>              | *06 |  |  |  |  |                                                                                                                                                    |
| ABC12-48925600G6  | yes | <i>IGHV4-4</i>               | *02 |  |  |  |  |                                                                                                                                                    |
| ABC12-48925600G6  | yes | <i>IGHV7-4-1</i>             | *01 |  |  |  |  |                                                                                                                                                    |
| ABC12-48925600G6  | yes | <i>IGHV2-5</i>               | *10 |  |  |  |  |                                                                                                                                                    |
| ABC12-46655100E11 |     | <i>no functional V genes</i> |     |  |  |  |  |                                                                                                                                                    |
| ABC14-954514B22   | yes | <i>IGHV3-23</i>              | *01 |  |  |  |  |                                                                                                                                                    |
| ABC14-954514B22   | yes | <i>IGHV3-23</i>              | *01 |  |  |  |  |                                                                                                                                                    |
| ABC14-954514B22   | yes | <i>IGHV1-24</i>              | *01 |  |  |  |  |                                                                                                                                                    |
| ABC14-986905I21   |     | <i>IGHV3-48</i>              | *02 |  |  |  |  |                                                                                                                                                    |
| ABC14-986905I21   |     | <i>IGHV3-49</i>              | *05 |  |  |  |  |                                                                                                                                                    |
| ABC14-986905I21   |     | <i>IGHV5-51</i>              | *01 |  |  |  |  |                                                                                                                                                    |
| ABC14-1051114P8   |     | <i>no functional V genes</i> |     |  |  |  |  |                                                                                                                                                    |
| WI2-1707G1        | yes | <i>IGHV3-d</i>               | *01 |  |  |  |  | Insertion                                                                                                                                          |
| WI2-1707G1        | yes | <i>IGHV1-c</i>               | *01 |  |  |  |  | Insertion                                                                                                                                          |
| WI2-1707G1        | yes | <i>IGHV4-39</i>              | *07 |  |  |  |  |                                                                                                                                                    |

|             |     |                 |     |  |  |  |  |           |
|-------------|-----|-----------------|-----|--|--|--|--|-----------|
| WI2-3737C11 | yes | <i>IGHV3-d</i>  | *01 |  |  |  |  | Insertion |
| WI2-3737C11 | yes | <i>IGHV1-c</i>  | *01 |  |  |  |  | Insertion |
| WI2-3737C11 | yes | <i>IGHV4-39</i> | *07 |  |  |  |  |           |
| ABC24-366M9 | yes | <i>IGHV3-30</i> | *02 |  |  |  |  |           |
| ABC24-366M9 | yes | <i>IGHV4-34</i> | *01 |  |  |  |  |           |

**Table S7.** IGHV gene and allelic variants identified from annotated fosmid clones

| CLONE                      | IGHC | IGHJ | IGHD    | IGHV       | V gene SMs | 2nd V gene          | 2nd V gene SMs | Notes                                                                                                                                 |
|----------------------------|------|------|---------|------------|------------|---------------------|----------------|---------------------------------------------------------------------------------------------------------------------------------------|
| ABC7_000043068300_J5       | M    | 4*02 | 2-15*01 | 1-69*12    | 10         | NA                  | NA             |                                                                                                                                       |
| ABC8_000041787500_L13      | G1   | 5*02 | 5-18*01 | 2-5*10     | 11         | NA                  | NA             |                                                                                                                                       |
| ABC8_000040989700_P12      | G1   | 4*02 | 3-10*01 | 3-20*01    | 8          | NA                  | NA             |                                                                                                                                       |
| ABC8_4_1_000000787522_D4   | M    | 4*02 | 3-22*01 | 3-49*03    | 4          | NA                  | NA             |                                                                                                                                       |
| ABC10_2_1_000044117600_K12 | G1   | 5*02 | 2-21*02 | 2-5*10     | 18         | NA                  | NA             |                                                                                                                                       |
| ABC10_2_1_000044789200_G15 | NI   | 5*02 | 2-21*02 | 2-5*10     | 18         | 3-7*01              | 0              |                                                                                                                                       |
| ABC11_2_1_000048179600_D4  | A1   | 6*03 | 2-21*01 | 4-59*01/08 | 28         | 4-61*01             | 0              |                                                                                                                                       |
| ABC11_2_1_000048290000_H9  | A1   | 5*02 | 2-21*01 | 4-39*01    | 24         | NA                  | NA             | Fosmid sequence contains 109 bp insertion within IGHV4-39 gene, which may be artifactual. This was removed for IMGT V-Quest analysis. |
| ABC11_2_1_000048039500_G23 | NI   | 4*02 | 5-24*01 | 3-33*01    | 27         | 4-34*01/<br>3-35*01 | 0/0            |                                                                                                                                       |
| ABC14_4_1_000000947614_C21 | G1   | 2*01 | 4-23*01 | 4-39*01    | 8          | NA                  | NA             |                                                                                                                                       |

**Table S8.** V-(D)-J somatic rearrangement events identified in fosmid clones  
SM, somatic mutation; NI, C gene not included in fosmid sequence; NA, not applicable
